# Supplementary material for: Targeted metagenomic recovery of four divergent viruses reveals shared and distinctive characteristics of giant viruses of marine eukaryotes
Source: Philos Trans R Soc Lond B Biol Sci. 2019 Oct 7;374(1786):20190086. doi: 10.1098/rstb.2019.0086 (PMC6792449; doi:10.1098/rstb.2019.0086)
Supplement: Table S2 [file rstb20190086supp4.xlsx]

## Sheet: hmm.64.ncldv.copy.number.txt
Supplementary Table 2: Presence and absence of 47 putatively ancestral proteins found in each of 67 NCLDVs.
		Maximum in Finished Genomes	mPacV-611	cPacV-1605	oPacV-662	oPacV-421	Acanthamoeba castellanii mamavirus	Acanthamoeba polyphaga mimivirus	Acanthamoeba polyphaga moumouvirus	Acanthocystis turfacea Chlorella virus 1	African swine fever virus strain BA71V	Amsacta moorei entomopoxvirus L	Anomala cuprea entomopoxvirus	Aureococcus anophagefferens virus isolate BtV 01	Bathycoccus sp RCC1105 virus BpV1	Bodo saltans virus 1	Cafeteria roenbergensis virus BV PW1	Canarypox virus	Catovirus CTV1	ChoanoV1	Chrysochromulina ericina virus isolate CeV 01B	Ectocarpus siliculosus virus 1	Edafosvirus	Emiliania huxleyi virus 86	Faunusvirus	Faustovirus D6	Faustovirus ST1	Feldmannia species virus	Frog virus 3	Harvfovirus	Heliothis virescens ascovirus 3e	Heterosigma akashiwo virus 01 isolate HaV53	Hokovirus HKV1	Hyperionvirus	Indivirus ILV1	Infectious spleen and kidney necrosis virus	Invertebrate iridescent virus 3	Invertebrate iridescent virus 6	Klosneuvirus KNV1	Lausannevirus	LCMAC102	LCMAC103	LCMiAC01	LCMiAC02	LCPAC104	LCPAC201	LCPAC202	Lymphocystis disease virus isolate China	Marseillevirus marseillevirus strain T19
NCVOG0004	AP (apurinic) endonuclease family 2	1	0	1	0	0	1	1	1	0	1	1	1	0	0	1	0	0	1	0	0	0	0	0	2	0	0	0	0	1	0	0	1	1	1	0	0	0	2	1	0	0	1	0	1	0	0	0	1
NCVOG0009	inhibitor of apoptosis protein	1	0	0	0	0	0	0	0	0	1	1	1	0	0	0	0	0	0	0	0	0	0	0	0	0	0	0	0	0	0	0	0	0	0	0	0	1	0	0	0	0	0	0	0	0	0	0	0
NCVOG0034	ATP-dependent DNA ligase	1	0	0	0	0	0	0	0	1	1	0	0	0	1	0	0	1	0	0	0	0	0	1	0	1	1	0	0	0	0	0	0	0	0	0	0	0	0	1	0	0	0	0	0	0	0	0	1
NCVOG0035	NAD+ dependent DNA ligase	1	1	1	1	1	1	1	1	0	0	1	1	1	0	1	1	0	1	1	1	0	0	0	1	0	0	0	0	0	0	0	1	0	1	0	1	1	1	0	0	0	1	1	0	0	0	0	0
NCVOG0036	DNA topoisomerase I	1	1	1	1	0	1	1	1	0	0	1	1	0	0	1	1	1	1	0	0	0	1	0	1	0	0	0	0	0	0	0	1	1	1	0	0	0	1	0	0	0	0	0	0	0	0	0	0
NCVOG0038	DNA polymerase elongation subunit family B	1	1	1	1	1	1	1	1	1	1	1	1	1	1	1	1	1	1	1	1	1	1	1	1	1	1	1	1	1	1	1	1	1	1	1	1	1	2	1	0	0	0	0	0	0	0	1	0
NCVOG0040	Dual specificity phosphatases (DSP); Ser/Thr and Tyr protein phosphatases	1	0	0	0	0	0	0	0	0	0	0	0	0	0	0	0	1	0	0	0	0	0	0	0	0	0	0	0	0	0	0	0	0	0	1	1	1	0	0	1	0	0	0	1	0	0	0	0
NCVOG0052	disulfide (thiol) oxidoreductase, Erv1 / Alr family	1	0	1	0	1	1	1	1	0	0	0	0	0	0	0	1	0	1	0	0	1	1	0	0	0	0	0	0	0	1	0	1	0	0	0	0	0	1	0	1	1	1	0	1	0	0	0	0
NCVOG0261	Poxvirus early transcription factor (VETF), large subunit	1	1	1	1	0	1	1	1	0	1	1	1	0	0	1	1	1	1	0	0	0	1	0	1	0	0	0	1	1	1	0	1	1	1	1	1	1	1	1	0	0	0	0	0	0	0	1	1
NCVOG0272	Transcription factor S-II (TFIIS)	1	0	0	0	0	0	0	0	0	0	0	0	0	0	0	0	1	0	0	0	0	0	0	0	0	0	0	0	0	0	0	0	0	0	0	0	0	0	0	1	1	1	1	1	2	2	0	0
NCVOG0273	divergent DNA-directed RNA polymerase subunit 5	1	0	0	0	0	1	1	1	0	0	0	0	0	0	0	0	0	0	0	0	0	0	0	0	0	0	0	0	0	0	0	0	0	0	0	0	0	0	1	1	1	1	2	2	2	2	0	0
NCVOG0278	RuvC, Holliday junction resolvases (HJRs); Poxvirus A22 family	1	0	1	0	0	1	1	1	1	0	0	0	0	1	0	1	0	0	0	0	0	0	0	0	0	0	0	0	0	0	0	0	0	0	0	0	0	0	0	0	0	0	0	0	0	0	0	0
NCVOG0319	Thymidine kinase	1	1	1	0	1	1	1	0	0	1	1	1	0	1	1	1	1	1	1	1	0	0	0	0	0	0	0	0	0	0	0	1	0	1	0	0	0	1	1	0	0	0	1	0	0	0	0	1
NCVOG1060	FLAP-like endonuclease XPG	1	1	1	0	0	1	1	1	0	0	1	1	0	0	0	1	1	0	1	0	0	0	1	1	0	0	0	1	0	1	1	0	0	0	1	1	1	0	1	0	0	0	0	0	0	0	1	1
NCVOG1068	dUTPase	1	0	0	0	0	0	0	0	1	0	1	1	0	1	0	0	1	0	0	0	0	0	1	0	0	0	0	1	0	0	0	0	0	0	0	0	1	0	0	0	0	0	0	0	0	0	0	0
NCVOG1115	uracil-DNA glycosylase	1	1	1	1	1	1	1	1	0	0	1	1	0	0	1	0	1	1	0	1	0	1	0	1	1	1	0	0	1	0	0	1	1	1	0	0	0	1	1	0	0	0	0	0	0	0	0	1
NCVOG1117	mRNA capping enzyme large subunit, methyltransferase domain	1	1	1	1	1	1	1	1	0	1	1	1	1	1	1	1	1	2	1	1	0	1	0	1	1	1	0	0	0	0	0	1	1	1	0	0	0	1	1	1	1	1	2	0	0	0	0	1
NCVOG1164	A1L transcription factor/late transcription factor VLTF-2	1	0	0	0	0	1	1	1	0	0	0	0	0	0	0	0	0	0	0	0	1	0	0	0	0	0	1	0	0	0	0	0	0	0	0	1	0	0	0	0	0	0	0	0	0	0	0	0
NCVOG1353	ribonucleoside diphosphate reductase, alpha subunit	1	1	1	1	1	1	1	1	1	1	0	0	1	1	1	1	0	1	1	1	1	1	1	1	1	1	1	1	0	0	0	1	0	1	0	1	1	2	1	0	0	0	0	0	0	0	1	1
NCVOG0059	FtsJ-like methyltransferase	2	1	2	1	1	2	2	1	0	1	0	0	0	0	1	1	0	1	0	1	0	2	0	1	1	1	0	0	0	0	0	0	1	2	0	0	0	0	0	1	0	0	0	0	0	0	0	0
NCVOG0076	DNA or RNA helicases of superfamily II	2	1	1	2	1	1	1	1	1	1	1	1	1	1	1	2	1	1	1	1	1	1	1	1	0	0	0	1	1	0	0	1	1	1	0	1	1	1	1	1	1	1	1	0	1	1	0	1
NCVOG0211	myristylated IMV envelope protein	2	0	0	0	0	1	1	2	0	0	0	1	0	0	0	0	1	0	0	0	0	0	0	0	0	0	0	1	0	1	0	0	0	0	1	1	2	0	0	1	0	1	1	1	0	0	1	0
NCVOG0236	Nudix hydrolase (D10 ortholog)	2	1	1	0	1	1	1	1	0	0	0	1	0	0	1	1	1	1	1	1	0	0	0	1	0	0	0	0	0	0	0	0	1	1	0	0	0	1	1	0	0	0	0	0	0	0	0	1
NCVOG0262	Poxvirus Late Transcription Factor VLTF3 like	2	1	1	1	1	1	1	1	1	1	0	0	1	1	1	1	0	1	1	1	1	1	1	1	0	0	1	0	0	1	1	1	1	0	0	1	1	0	1	0	0	1	1	0	0	0	0	1
NCVOG0267	RNA-helicase DExH-NPH-II	2	1	1	1	0	2	2	2	0	1	1	1	0	0	2	1	1	2	0	0	0	0	0	1	1	1	0	0	1	0	0	2	2	2	0	0	0	2	0	0	0	0	1	0	0	0	0	0
NCVOG0271	DNA-directed RNA polymerase subunit beta	2	1	1	1	1	1	1	1	0	1	1	1	1	0	1	1	1	2	2	2	0	2	1	2	1	1	0	1	2	1	0	1	2	1	1	1	1	2	1	0	0	2	2	0	0	0	1	1
NCVOG0274	DNA-directed RNA polymerase subunit alpha	2	1	1	1	1	1	1	1	0	1	1	1	2	0	1	1	1	3	1	1	0	3	1	2	2	2	0	1	3	2	0	1	0	1	1	1	2	4	2	1	1	0	0	0	0	0	1	2
NCVOG0276	ribonucleoside diphosphate reductase, beta subunit	2	1	1	1	1	1	1	1	1	1	0	0	1	1	1	1	1	1	1	2	1	1	1	1	1	1	1	0	0	0	0	1	0	1	1	0	0	1	1	0	0	0	0	0	0	0	0	1
NCVOG0320	Thymidylate kinase	2	0	0	0	0	0	0	0	0	1	0	0	0	0	0	0	2	0	0	0	0	0	1	0	0	0	0	0	0	1	0	0	0	0	0	1	2	0	0	0	0	1	1	0	0	0	0	0
NCVOG1088	RNA ligase (conserved in irido-, asfa- asco- and Marseille viruses)	2	0	0	0	0	0	0	0	0	1	0	0	0	0	0	1	0	0	0	0	0	0	0	0	0	0	0	1	0	1	0	0	0	0	1	1	1	0	1	0	0	0	0	0	0	0	1	1
NCVOG1127	transcription initiation factor IIB	2	1	1	1	1	1	1	1	1	1	0	0	0	1	1	1	0	1	1	2	0	1	0	1	0	0	0	0	1	0	0	0	1	1	0	0	1	1	0	1	1	1	1	1	1	1	0	0
NCVOG1192	YqaJ viral recombinase	2	1	1	0	1	1	1	1	2	1	0	0	1	2	1	1	0	1	1	1	1	0	0	1	0	0	1	0	1	0	1	1	1	1	0	0	0	1	0	1	1	6	6	0	0	0	0	0
NCVOG0012	C-type lectin	3	0	0	0	0	0	0	0	0	0	0	0	0	0	0	0	0	0	0	0	0	0	3	0	0	0	0	0	0	0	0	0	0	0	0	0	0	0	0	0	0	0	1	0	1	0	0	0
NCVOG0246	Ulp1 protease	3	1	1	1	1	1	1	1	0	1	0	0	0	0	1	1	0	1	1	1	0	0	0	1	0	0	3	0	0	0	0	1	1	1	0	0	0	1	0	1	1	0	0	0	0	0	0	0
NCVOG0256	IMV envelope protein p35	3	0	0	0	0	3	3	2	0	0	1	0	0	0	0	0	1	0	0	0	0	0	0	0	0	0	0	0	0	0	0	0	0	0	0	0	0	0	0	1	1	1	1	1	1	0	0	0
NCVOG0329	UBCc, Ubiquitin-conjugating enzyme E2	3	2	2	0	0	3	3	2	0	1	0	0	0	0	0	2	0	0	1	1	0	0	0	1	0	0	0	0	1	0	0	1	1	1	0	0	0	1	0	0	0	0	0	0	0	0	0	0
NCVOG0330	RING-finger-containing E3 ubiquitin ligase	3	0	0	0	0	2	2	1	0	0	0	0	0	0	0	2	0	0	0	0	1	0	0	0	0	0	1	0	0	0	0	1	0	0	0	0	0	0	1	0	0	1	1	0	0	0	0	1
NCVOG1122	Myristylated protein	3	0	0	0	0	1	1	3	0	0	2	2	0	0	0	0	2	0	0	0	0	0	0	0	0	0	0	1	0	0	0	0	0	0	0	1	1	0	0	0	0	0	0	0	0	0	1	0
NCVOG0249	packaging ATPase	4	1	1	1	1	1	1	1	1	1	0	0	1	1	1	1	0	2	1	1	1	1	1	1	0	0	1	1	1	1	1	1	1	1	1	1	1	1	1	0	0	0	1	0	0	0	1	1
NCVOG0024	Superfamily II helicase related to herpesvirus replicative helicase	5	0	0	0	0	5	4	2	0	1	0	0	0	0	2	0	0	2	0	0	0	0	0	0	1	1	0	0	0	0	0	0	0	2	0	0	0	3	3	0	0	0	0	0	0	0	0	3
NCVOG0037	DNA topoisomerase II	6	1	2	1	1	1	1	1	1	1	0	0	1	1	1	1	0	2	1	1	0	0	1	1	1	1	0	0	1	0	1	1	0	1	0	1	1	1	1	0	0	0	0	0	0	0	0	1
NCVOG0010	BRO-like protein	8	0	0	0	0	1	1	1	0	0	3	4	0	0	0	0	0	0	0	0	1	0	0	0	0	0	0	0	0	8	0	0	0	0	0	1	2	0	0	1	1	0	0	1	0	0	0	0
NCVOG0022	NCLDV major capsid protein	8	6	5	4	2	4	4	3	5	1	0	0	2	7	3	4	0	4	6	4	1	1	1	2	0	0	1	1	5	1	1	5	4	6	1	1	1	6	1	0	0	0	1	0	0	0	1	1
NCVOG1361	T5orf172 domain	10	0	0	0	0	0	1	0	0	1	3	10	0	0	0	3	0	0	0	0	1	0	0	0	0	0	0	0	0	0	0	0	0	0	0	1	3	0	1	0	0	0	0	0	0	0	0	1
NCVOG0023	D5-like helicase-primase	13	1	1	1	1	2	1	1	1	1	1	1	1	1	13	1	1	1	1	1	1	0	1	1	1	1	1	1	2	1	1	1	3	1	1	1	1	2	1	1	1	1	1	1	1	2	1	1
NCVOG1360	KilA domain (pfam04383)	19	0	0	0	0	6	7	4	0	0	3	2	0	0	0	0	17	0	0	0	0	0	0	0	0	0	0	0	0	0	0	0	0	0	0	0	2	0	0	1	1	1	2	1	1	1	0	0
NCVOG1424	uncharacterized domain DUF3627; found downstream KilA, BRO, and MSV199 domains. Also is found in some baculoviruses (gi 165969059, 18138388)	19	0	0	0	0	5	5	3	0	0	6	6	0	0	0	0	12	0	0	0	0	0	0	0	0	0	0	0	0	4	0	0	0	0	0	0	8	0	0	0	0	0	0	0	0	0	0	0
[truncated: 34 more columns]
