# Supplementary material for: Targeted metagenomic recovery of four divergent viruses reveals shared and distinctive characteristics of giant viruses of marine eukaryotes
Source: Philos Trans R Soc Lond B Biol Sci. 2019 Oct 7;374(1786):20190086. doi: 10.1098/rstb.2019.0086 (PMC6792449; doi:10.1098/rstb.2019.0086)
Supplement: Table S5 [file rstb20190086supp7.xlsx]

## Sheet: STable_5_metaTmapping
Supplementary Table 5: Metatranscriptome mapping (rpkm) and pfam identifier of each respective gene in cPacV-1605.
Gene_ID	pfam_abbrev	Pfam ID	CN13ID_155_C17_100m_0.8um	CN13ID_70_C50_10m_0.8um	MBTS_20Mar14_M1_3um	MBTS_20Mar14_M2_3um	MBTS_2Apr14_M1_3um	MBTS_5May14_M1_3um	MBTS_5May14_M2_3um
c14_136	SWIB	PF02201.17	0	6.45372e-05	0.000550007	0.00453073	0.000825137	3.343e-05	1.74403e-05
c14_130	none	none	5.2872e-06	8.83178e-05	0.0004194	0.00352309	0.000769763	3.73611e-05	1.67067e-05
c14_39	none	none	0	6.5986e-05	0.000421066	0.00334165	0.000463186	3.98772e-05	5.20095e-05
c4_234	Capsid_NCLDV	PF04451.11	6.97403e-06	0.000128144	0.000446022	0.00285088	0.000742772	8.80015e-05	5.87648e-05
c6_296	none	none	0	3.11833e-05	0.000277653	0.0021835	0.000533543	7.06685e-05	7.3735e-05
c4_209	Pox_P4B	PF03292.13	3.08444e-06	8.24365e-05	0.000342537	0.00187455	0.000473175	4.98187e-05	2.59902e-05
c14_53	none	none	0	0.000107294	0.000267495	0.00178489	0.000451889	0	2.02964e-05
c4_248	none	none	4.44388e-06	4.70129e-05	0.00029302	0.00159608	0.000453757	2.69159e-05	3.27645e-05
c4_119	none	none	0	8.48825e-05	0.00014276	0.00134482	0.000653757	1.7099e-05	3.56819e-05
c2_12	none	none	0	6.86843e-05	0.000280298	0.00121449	0.000457016	1.0377e-05	3.24818e-05
c1_206	none	none	1.12636e-05	1.25432e-05	0.000145188	0.00112847	0.00070437	2.27406e-05	1.18637e-05
c6_36	none	none	0	1.69195e-05	0.000112987	0.000768279	0.000430525	2.30061e-05	8.00146e-06
c7_11	SBP_bac_3	PF00497.19	5.3024e-06	4.72383e-05	4.20606e-05	0.000556295	0.00044557	1.07053e-05	0
c14_195	zf-C3HC4_3	PF13920.5	0	3.24712e-05	7.70988e-05	0.000688994	0.000237427	2.94349e-05	1.02374e-05
c4_281	none	none	0	1.5711e-05	8.39334e-05	0.000800077	0.000151638	1.42419e-05	0
c4_42	none	none	0	0	0.000122921	0.000631426	0.000168239	1.39049e-05	7.25413e-06
c4_291	DUF2828	PF11443.7	0	1.15548e-05	0.000108027	0.000698754	0.000116593	5.23716e-06	0
c4_240	none	none	0	9.88555e-06	0.000140832	0.000578932	0.00015613	2.68835e-05	9.35002e-06
c7_30	none	none	0	0	8.01369e-05	0.000687498	0.000112815	0	1.21609e-05
c1_165	none	none	0	5.52349e-05	0.000122952	0.000457084	0.000205976	2.5035e-05	0
c14_31	none	none	0	1.59552e-05	0.00015627	0.00050105	0.000111997	2.89265e-05	3.01817e-05
c14_163	none	none	0	0	5.03087e-05	0.000503534	0.000198306	7.68277e-05	0
c1_285	none	none	0	0	0.000102635	0.000559055	0.00011559	0	3.11501e-05
c14_145	none	none	0	0	0.00011921	0.000553966	0.000132159	0	0
c6_55	none	none	3.55425e-06	1.18741e-05	8.81049e-05	0.000544217	0.00010766	1.43517e-05	7.48723e-06
c4_51	none	none	0	3.7401e-05	1.11005e-05	0.00048674	0.000185962	1.13012e-05	0
c4_4	HSP90	PF00183.17	0	8.77724e-06	5.73113e-05	0.000509059	0.000138626	1.06087e-05	2.76725e-06
c6_260	Peptidase_C1	PF00112.22	5.6606e-06	1.26074e-05	5.05147e-05	0.000540372	9.95589e-05	5.71424e-06	5.96219e-06
c1_296	CLP_protease	PF00574.22	0	7.61273e-06	6.10048e-05	0.000523363	8.68354e-05	2.07026e-05	7.20033e-06
c4_278	none	none	0	1.05457e-05	8.45083e-05	0.000447531	0.000120291	9.55961e-06	2.99233e-05
c4_225	none	none	7.99192e-06	2.66995e-05	5.54705e-05	0.0004079	0.000140562	1.61353e-05	2.52532e-05
c9_11	ubiquitin	PF00240.22	0	0	0.00011973	0.000399456	0.000141585	0	1.27185e-05
c4_144	none	none	0	1.1947e-05	4.78689e-05	0.00051207	7.86203e-05	1.08299e-05	0
c6_138	none	none	0	0	2.81936e-05	0.000322499	0.000263941	2.87034e-05	1.49745e-05
c4_272	TBP	PF00352.20	0	6.99057e-06	8.09165e-05	0.000391593	0.000159478	0	6.61188e-06
c7_2	SUI1	PF01253.21	0	0	3.21622e-05	0.000444539	9.50822e-05	0	3.41646e-05
c14_22	none	none	0	1.11168e-05	6.9288e-05	0.000367977	0.000126805	1.00773e-05	0
c1_166	HSP70	PF00012.19	0	6.16795e-06	6.59027e-05	0.000379539	0.000124475	8.3868e-06	0
c1_122	ACBP	PF00887.18	0	0	9.75739e-05	0.000297632	0.000173077	0	0
c6_92	none	none	0	0	3.89833e-05	0.0003716	0.000140858	0	1.38035e-05
c2_8	none	none	0	0	8.29181e-05	0.000421546	4.90267e-05	0	0
c7_37	none	none	0	5.50703e-05	6.53788e-05	0.000303814	0.000104694	8.32014e-06	8.68117e-06
c14_26	none	none	6.36411e-06	2.83484e-05	7.57236e-05	0.000306773	8.08399e-05	0	1.34064e-05
c6_114	none	none	0	5.26834e-06	4.2218e-05	0.000344304	9.70749e-05	4.77572e-06	4.98295e-06
c4_69	none	none	1.0092e-05	1.12385e-05	2.00133e-05	0.000372006	6.90271e-05	0	1.06297e-05
c4_82	NMT1	PF09084.10	5.6606e-06	6.30368e-06	3.92892e-05	0.000294262	0.000138276	5.71424e-06	0
c6_131	Peptidase_C14	PF00656.21	0	1.80342e-05	3.21151e-05	0.000244904	0.000181974	0	8.52864e-06
c1_120	D5_N	PF08706.10	0	7.02513e-06	4.79559e-05	0.000349803	5.75313e-05	4.24549e-06	2.21485e-06
c4_120	none	none	0	8.18975e-06	7.29209e-05	0.000229384	0.000136533	7.42395e-06	0
c4_213	none	none	0	0	5.00582e-05	0.000347032	5.38141e-05	0	0
c4_200	Asn_synthase	PF00733.20	0	7.37568e-06	2.6269e-05	0.000328654	6.79524e-05	1.3372e-05	6.97612e-06
c14_32	none	none	0	7.01446e-06	3.74737e-05	0.000285768	0.00010463	0	1.32689e-05
c4_9	none	none	0	6.17104e-06	7.6925e-05	0.000282833	7.58053e-05	0	5.83674e-06
c6_59	Lon_C	PF05362.12	0	7.38674e-06	4.60396e-05	0.000280559	8.1017e-05	1.1718e-05	1.74665e-06
c7_87	none	none	0	0	4.47037e-05	0.000284085	5.87374e-05	0	3.1658e-05
c7_5	none	none	0	0	3.03972e-05	0.00031873	4.79276e-05	6.18937e-06	0
c2_1	none	none	0	2.37177e-05	5.63148e-05	0.000241564	3.46844e-05	2.86666e-05	7.47762e-06
c14_207	none	none	0	0	3.0807e-05	0.000308344	4.93328e-05	3.92051e-06	0
c4_192	YqaJ	PF09588.9	3.80358e-06	0	3.39428e-05	0.000284007	7.06141e-05	0	0
c4_229	none	none	0	0	3.478e-05	0.000276277	7.99722e-05	0	0
c2_3	ResIII	PF04851.14	0	8.21707e-06	2.92656e-05	0.000282455	5.40744e-05	3.72436e-06	3.88597e-06
c11_1	none	none	0	8.89985e-06	7.92435e-05	0.000188843	0.000101517	0	0
c1_117	none	none	0	1.06002e-05	2.83149e-05	0.000260908	7.44074e-05	0	0
c7_9	none	none	0	6.06768e-05	0	0.000231746	7.98596e-05	0	0
c14_27	Rnone_pol_Rpb2_6	PF00562.27	0	1.38983e-05	6.03279e-05	0.00024477	4.7255e-05	3.14968e-06	0
c14_88	none	none	0	0	5.58417e-05	0.000276795	2.20116e-05	1.13703e-05	0
c4_6	none	none	4.51094e-06	0	2.68368e-05	0.000225971	8.81539e-05	4.55368e-06	1.42538e-05
c1_2	DEAD	PF00270.28	0	6.26096e-06	2.78735e-05	0.000258613	6.04292e-05	1.89184e-06	3.94786e-06
c1_123	none	none	0	0	1.99044e-05	0.000256141	3.92293e-05	4.05286e-05	0
c6_108	none	none	0	0	1.29944e-05	0.000235346	8.96371e-05	0	1.38035e-05
c1_83	none	none	4.21204e-06	4.69055e-06	3.75879e-05	0.000242846	4.93877e-05	4.25195e-06	0
c4_70	TFIIS_C	PF01096.17	0	1.27774e-05	1.13769e-05	0.000303653	1.12113e-05	0	0
c1_43	none	none	0	1.37165e-05	4.88521e-05	0.000221194	4.81411e-05	0	0
c4_198	none	none	0	0	6.58301e-06	0.00025728	6.4872e-05	0	0
c6_241	Lon_C	PF05362.12	0	2.4048e-06	2.9977e-05	0.00024901	3.37608e-05	6.5398e-06	6.82358e-06
c4_27	eIF-1a	PF01176.18	0	0	2.33347e-05	0.000255798	3.44926e-05	1.18783e-05	0
c6_330	UQ_con	PF00179.25	0	0	3.41306e-05	0.000216895	6.72677e-05	0	0
c4_218	none	none	0	2.89821e-05	3.87081e-05	0.000184488	6.35745e-05	0	0
c14_160	Dnone_topoisoIV	PF00521.19	1.51518e-06	3.37463e-06	4.0564e-05	0.000213383	4.88566e-05	0	3.19182e-06
c14_100	Rnone_pol_Rpb1_5	PF04998.16	0	0	2.31107e-05	0.000232536	4.80791e-05	2.61429e-06	4.09159e-06
c6_27	TPR_1	PF00515.27	0	0	2.603e-05	0.000206771	6.8403e-05	8.83357e-06	0
c2_9	none	none	0	0	2.90653e-05	0.00017547	0.000105022	0	0
c1_157	UQ_con	PF00179.25	0	1.37165e-05	2.44261e-05	0.000209552	4.81411e-05	1.24339e-05	0
c4_262	none	none	0	1.1897e-05	2.4717e-05	0.000201951	5.56738e-05	7.18971e-06	3.75085e-06
c6_31	Pkinonese	PF00069.24	0	8.45394e-06	5.64549e-05	0.000179381	5.93421e-05	0	0
c4_94	none	none	0	0	8.51499e-06	0.000219151	7.55195e-05	0	0
c6_271	XPG_I	PF00867.17	0	5.85427e-06	2.6063e-05	0.00020372	6.16407e-05	0	5.53713e-06
c6_3	none	none	0	1.31878e-05	3.52269e-05	0.000201475	4.62855e-05	0	0
c1_242	CSD	PF00313.21	0	1.74221e-05	7.75622e-06	0.00019223	6.879e-05	7.89648e-06	0
c14_131	none	none	0	0	3.86173e-05	0.000207062	4.28121e-05	4.91445e-06	0
c14_125	DEAD	PF00270.28	0	5.17537e-06	1.84324e-05	0.000184488	6.81156e-05	0	9.79002e-06
c10_29	none	none	0	1.25432e-05	0	0.000212919	4.40231e-05	0	1.18637e-05
c6_28	Peptidase_M41	PF01434.17	0	3.22445e-06	1.72261e-05	0.000216202	3.39508e-05	2.92294e-06	6.09954e-06
c2_13	Porin_4	PF13609.5	0	0	6.07944e-05	0.000168057	4.79276e-05	0	0
c6_181	dNK	PF01712.18	0	0	6.39866e-06	0.000237876	3.15276e-05	0	0
c1_365	none	none	0	4.37097e-06	2.33512e-05	0.000207751	3.83523e-05	0	0
c6_49	Rnone_pol_L_2	PF13656.5	0	0	2.15256e-05	0.000194929	4.24246e-05	5.47872e-06	5.71645e-06
c4_249	Thioredoxin	PF00085.19	0	4.14262e-05	3.68855e-05	0.000175802	1.21162e-05	0	0
c1_292	none	none	0	0	2.37902e-05	0.000170081	4.6888e-05	0	2.52714e-05
c3_6	PAN_4	PF14295.5	0	2.12613e-05	1.89309e-05	0.000174439	4.97476e-05	0	0
c10_6	Thioredoxin	PF00085.19	0	4.98008e-05	0	0.000126805	8.73936e-05	0	0
c6_17	FtsJ	PF01728.18	0	0	4.44184e-05	0.000173212	4.37719e-05	0	0
c1_304	none	none	0	0	2.93243e-05	0.000195669	2.88975e-05	0	0
c7_58	SUI1	PF01253.21	0	0	2.63637e-05	0.00021361	1.299e-05	0	0
c4_227	none	none	0	0	3.49277e-05	0.000183117	3.44193e-05	0	0
c14_28	none	none	0	1.24544e-05	3.32679e-05	0.000163844	3.82476e-05	0	0
c14_144	none	none	0	1.12282e-05	2.99926e-05	0.000171539	2.46301e-05	1.01783e-05	0
c14_171	none	none	0	7.9059e-06	4.22361e-05	0.000127492	6.93689e-05	0	0
c4_78	none	none	0	0	3.01079e-05	0.000149238	5.73614e-05	8.17396e-06	0
c14_23	PCnone_C	PF02747.14	0	6.58684e-06	2.34595e-05	0.000156535	5.20155e-05	0	6.23001e-06
c9_3	Peptidase_C1_2	PF03051.14	0	9.15111e-06	8.14807e-06	0.000174757	5.21916e-05	0	0
c4_137	CSD	PF00313.21	0	0	4.01523e-05	0.000164032	3.39153e-05	5.83976e-06	0
c4_83	ELFV_dehydrog_N	PF02812.17	0	4.97471e-06	2.21472e-05	0.00018578	3.05548e-05	0	0
c14_199	none	none	0	1.20996e-05	3.23201e-05	0.000164312	3.18497e-05	0	0
c6_205	none	none	0	0	0	0.000178199	6.14072e-05	0	0
c4_219	none	none	0	5.04811e-06	1.34844e-05	0.000158529	6.20112e-05	0	0
c1_190	none	none	0	0	3.15757e-05	0.000150494	5.18602e-05	0	0
c3_5	XRN_N	PF03159.17	0	3.46969e-06	4.01619e-05	0.000147244	3.6533e-05	3.14525e-06	0
c1_41	zf-rbx1	PF12678.6	0	0	1.14481e-05	0.000196428	2.2563e-05	0	0
c14_36	TFIIB	PF00382.18	0	1.49968e-05	4.45102e-06	0.000161228	4.38623e-05	0	4.72814e-06
c14_151	none	none	0	0	1.64181e-05	0.000179977	3.23583e-05	0	0
c14_135	none	none	0	0	2.44079e-05	0.000131842	6.41405e-05	8.28311e-06	0
c1_364	AAA	PF00004.28	0	1.41174e-05	2.82824e-05	0.000143785	4.02578e-05	0	0
c4_290	none	none	0	0	8.43639e-06	0.000193003	2.49408e-05	0	0
c14_17	Pox_MCEL	PF03291.15	1.80261e-06	0	1.60863e-05	0.000168673	3.69884e-05	1.81969e-06	0
c4_266	EIF_2_alpha	PF07541.11	0	7.61273e-06	1.35566e-05	0.000129225	6.67965e-05	0	7.20033e-06
c1_22	sCache_2	PF17200.3	0	0	4.46551e-05	0.000161753	1.76021e-05	0	0
c6_253	Lactamase_B_2	PF12706.6	0	0	1.9196e-05	0.000182981	1.89166e-05	0	0
c4_292	none	none	0	0	1.24487e-05	0.00018393	2.4535e-05	0	0
c6_32	none	none	0	0	4.12305e-05	0.000117906	6.09455e-05	0	0
c1_42	Thioredoxin	PF00085.19	0	0	1.43176e-05	0.000191071	0	1.45765e-05	0
c4_155	Ribonucleas_3_3	PF14622.5	0	5.37877e-06	3.35245e-05	0.000136956	4.24756e-05	0	0
c6_201	none	none	0	0	2.59889e-05	9.90932e-05	3.84159e-05	3.96882e-05	1.38035e-05
c6_118	Rep_fac_C	PF08542.10	0	5.95618e-06	4.24267e-05	0.000126382	4.18092e-05	0	0
c14_182	NUDIX	PF00293.27	0	0	8.35922e-06	0.000199206	8.23756e-06	0	0
c6_5	Resolvase	PF00239.20	6.71166e-06	1.49483e-05	2.66197e-05	0.000152248	1.31161e-05	0	0
c4_300	none	none	0	0	3.10103e-05	0.000137946	4.07452e-05	0	0
c4_206	none	none	0	1.26983e-05	2.2613e-05	0.000129332	4.45677e-05	0	0
c14_99	Rnone_pol_Rpb1_1	PF04997.11	0	3.96058e-05	0	0.000151268	1.73757e-05	0	0
c6_326	none	none	0	1.26203e-05	1.1237e-05	0.000139248	4.42937e-05	0	0
c1_207	Rnone_pol_Rpb6	PF01192.21	0	0	1.90736e-05	0.000118179	6.57858e-05	0	0
c6_6	none	none	0	0	2.42998e-05	0.000154421	2.39461e-05	0	0
c14_90	none	none	0	0	0	0.000139702	6.01764e-05	0	0
c10_49	none	none	0	1.06002e-05	0	0.000179937	9.30092e-06	0	0
c14_38	Lon_C	PF05362.12	0	6.09973e-06	1.81038e-05	0.000129428	3.38966e-05	9.2156e-06	1.9231e-06
c4_304	none	none	0	0	0	0.000167148	3.14177e-05	0	0
c4_20	Ribonuc_red_sm	PF00268.20	0	0	2.23822e-05	0.000160015	5.51412e-06	5.69675e-06	0
c1_333	none	none	0	0	1.81578e-05	0.000121159	5.36805e-05	0	0
c6_155	eIF-5_eIF-2B	PF01873.16	0	0	1.24628e-05	0.000154439	1.22814e-05	1.26882e-05	0
c14_120	Dynonemin_N	PF00350.22	0	6.01435e-06	1.07103e-05	0.000137826	2.90245e-05	8.17795e-06	0
c14_192	AAA	PF00004.28	0	5.25486e-06	9.35777e-06	0.000111501	5.99402e-05	0	4.97019e-06
c8_20	none	none	0	0	1.10335e-05	0.000147244	3.26187e-05	0	0
c4_263	none	none	0	0	0	0.000177081	1.35604e-05	0	0
c7_15	4HBT_2	PF13279.5	0	1.27774e-05	2.27537e-05	0.000108447	4.48451e-05	0	0
c14_92	none	none	0	0	1.95845e-05	0.000145614	2.31593e-05	0	0
c1_270	none	none	0	6.99057e-06	4.35704e-05	0.000112731	2.4535e-05	0	0
c14_173	none	none	5.44331e-06	0	1.07946e-05	0.000133766	3.72312e-05	0	0
c1_90	none	none	0	0	2.59889e-05	0.000161026	0	0	0
c4_23	Ribonuc_red_lgC	PF02867.14	0	7.85882e-06	2.33248e-05	0.000106722	4.82691e-05	0	0
c6_346	DpnI	PF06044.11	0	1.02304e-05	0	0.000130245	4.48824e-05	0	0
c6_34	zinc_ribbon_6	PF14599.5	0	0	1.1921e-05	0.000130679	1.76212e-05	1.82048e-05	6.33159e-06
c6_109	ELFV_dehydrog	PF00208.20	0	4.92696e-06	2.19346e-05	0.00012127	3.45846e-05	0	0
c10_42	DUF4856	PF16148.4	0	4.39907e-06	1.95845e-05	0.000112011	4.24587e-05	3.98772e-06	0
c4_305	AAA	PF00004.28	0	0	3.74311e-05	0.000111501	3.22755e-05	0	0
c4_91	Pro-kuma_activ	PF09286.10	0	0	1.31581e-05	0.000134834	2.91749e-05	3.34902e-06	0
c4_25	GSDH	PF07995.10	4.13643e-06	4.60635e-06	4.10146e-05	9.77406e-05	2.82923e-05	0	4.35682e-06
c6_94	none	none	0	5.58359e-06	1.49147e-05	0.000113737	4.4093e-05	0	0
c1_15	none	none	0	1.20996e-05	1.07734e-05	0.000133503	2.12331e-05	0	0
c1_225	none	none	0	0	0	0.000146831	3.03586e-05	0	0
c7_32	DHDPS	PF00701.21	0	0	2.3611e-05	0.000106907	4.65347e-05	0	0
c6_102	NUDIX	PF00293.27	0	0	7.21533e-05	6.87785e-05	3.55516e-05	0	0
c4_93	UQ_con	PF00179.25	0	0	2.42639e-05	0.000115645	3.58662e-05	0	0
c14_9	none	none	0	0	7.23437e-06	0.000117232	4.99035e-05	0	0
c14_12	RQC	PF09382.9	0	2.92158e-06	2.60135e-05	0.000121504	1.79444e-05	5.29679e-06	0
c6_338	eIF-5_eIF-2B	PF01873.16	0	0	9.48728e-06	0.00012661	3.73968e-05	0	0
c9_10	Mito_carr	PF00153.26	0	1.4681e-05	1.30719e-05	7.47628e-05	7.08489e-05	0	0
c6_56	Hom_end_hint	PF05203.15	3.18022e-06	0	1.26133e-05	0.00012324	3.10744e-05	3.21036e-06	0
c4_12	AAA	PF00004.28	0	4.88011e-06	1.30356e-05	0.000111833	3.85377e-05	4.42378e-06	0
c6_257	Peptidase_C14	PF00656.21	0	0	2.02723e-05	7.24653e-05	7.99089e-05	0	0
c1_125	Rnonese_H_2	PF13482.5	0	2.48635e-06	1.10691e-05	0.000141389	1.52712e-05	2.25386e-06	0
c14_11	DnoneJ	PF00226.30	0	0	4.18599e-05	0.000119706	1.03127e-05	0	0
c10_24	none	none	0	0	1.59408e-05	9.11715e-05	6.28353e-05	0	0
c6_18	Rnone_pol_Rpb5_C	PF01191.18	0	0	2.50777e-05	0.000127492	1.64751e-05	0	0
c4_270	none	none	0	8.67422e-06	1.54469e-05	9.57087e-05	3.04441e-05	0	1.64086e-05
c4_73	none	none	0	0	1.32776e-05	0.000113909	3.9253e-05	0	0
c4_158	GTP_EFTU	PF00009.26	0	0	1.72171e-05	0.000114883	3.3933e-05	0	0
c4_208	AAA	PF00004.28	0	8.35077e-06	1.85886e-05	0.000113403	2.56453e-05	0	0
c4_64	none	none	0	6.71858e-06	1.79465e-05	0.000115948	2.16153e-05	2.03011e-06	0
c6_251	none	none	0	0	0	0.000164204	0	0	0
c14_1	none	none	0	0	1.30875e-05	0.000124753	2.5794e-05	0	0
c6_185	none	none	0	1.03334e-05	1.84015e-05	7.89337e-05	3.62674e-05	1.87343e-05	0
c14_161	none	none	0	2.0393e-05	5.44734e-05	5.19255e-05	3.5787e-05	0	0
c7_88	none	none	0	4.66922e-06	4.15743e-06	9.90744e-05	5.32599e-05	0	0
c1_212	none	none	1.60628e-06	0	1.75197e-05	0.000119938	2.19732e-05	0	0
c14_70	ketoacyl-synt	PF00109.25	8.784e-07	1.95638e-06	3.04841e-05	0.000101289	2.48906e-05	0	9.25201e-07
c4_32	UCH	PF00443.28	4.63571e-06	0	4.59652e-06	0.000109538	3.17073e-05	4.67964e-06	4.8827e-06
c1_337	RRM_1	PF00076.21	0	0	9.74005e-06	0.000129983	1.91966e-05	0	0
c4_54	DUF962	PF06127.10	0	0	0	0.000112302	2.11087e-05	1.09039e-05	1.13771e-05
c14_208	BET	PF17035.4	0	0	0	0.000118799	3.68443e-05	0	0
c4_62	HSP70	PF00012.19	0	3.03384e-06	5.40261e-06	0.000105573	3.72678e-05	2.75015e-06	0
c1_52	none	none	0	0	2.2613e-05	8.62213e-05	4.45677e-05	0	0
c6_267	none	none	0	0	2.4104e-05	6.89297e-05	5.93828e-05	0	0
c4_141	AAA	PF00004.28	0	7.36246e-06	9.83321e-06	0.000112479	1.93802e-05	3.33701e-06	0
c4_265	none	none	0	1.02988e-05	1.3755e-05	0.000100522	2.25913e-05	4.6679e-06	0
c6_51	Glutaredoxin	PF00462.23	0	0	2.36704e-05	0.000127859	0	0	0
c14_35	UDG	PF03167.18	0	0	1.56452e-05	0.000111851	1.54175e-05	0	8.30965e-06
c1_209	none	none	0	6.48284e-06	1.73168e-05	0.000104543	2.2753e-05	0	0
c4_60	none	none	9.14117e-06	1.01797e-05	0	8.63994e-05	4.46598e-05	0	0
c6_204	Peptidase_M13_N	PF05649.12	0	9.79644e-06	2.03529e-05	9.14616e-05	2.57871e-05	2.96013e-06	0
c4_214	none	none	0	8.18975e-06	7.29209e-06	9.03633e-05	2.15579e-05	1.48479e-05	7.74609e-06
c14_62	Vint	PF14623.5	0	0	1.42865e-05	0.000106677	2.58108e-05	2.42415e-06	0
c14_162	none	none	0	0	2.63215e-05	8.78164e-05	2.16153e-05	1.33988e-05	0
c1_47	none	none	0	3.04886e-05	1.35734e-05	6.46927e-05	4.01275e-05	0	0
c4_211	AAA	PF00004.28	0	4.48558e-06	7.98784e-06	9.13707e-05	3.54221e-05	4.06614e-06	4.24258e-06
c4_63	Cullin	PF00888.21	0	0	1.21266e-05	0.00011097	2.15102e-05	2.46918e-06	0
c7_12	Sulfatase	PF00884.22	0	9.68729e-06	1.07819e-05	9.45535e-05	3.18748e-05	0	0
c6_182	Bac_surface_Ag	PF01103.22	4.69474e-06	1.56843e-05	9.3101e-06	7.54345e-05	3.66984e-05	4.73923e-06	0
c10_44	Chloroa_b-bind	PF00504.20	0	1.13004e-05	1.00617e-05	0.000115094	9.9153e-06	0	0
c14_127	none	none	0	0	0	0.000129465	1.67301e-05	0	0
c3_7	none	none	0	0	2.87102e-05	9.57858e-05	2.12193e-05	0	0
c6_305	5_3_exonuc_N	PF02739.15	0	7.31436e-06	6.51265e-06	9.93286e-05	2.56714e-05	6.63042e-06	0
c4_84	Helicase_C	PF00271.30	0	2.63305e-06	1.17222e-05	9.16263e-05	3.69651e-05	0	2.49041e-06
c1_224	IlvN	PF07991.11	0	1.15765e-05	1.54614e-05	0.000108081	1.01576e-05	0	0
c10_31	polyprenyl_synt	PF00348.16	0	4.06783e-06	2.53537e-05	7.59562e-05	3.21232e-05	3.68746e-06	3.84747e-06
c1_248	dUTPase	PF00692.18	0	0	0	0.000134295	1.06795e-05	0	0
c14_21	none	none	0	2.08064e-05	0	0.000123615	0	0	0
c4_147	none	none	0	0	3.68855e-05	5.86005e-05	3.63487e-05	1.25175e-05	0
c7_61	none	none	0	0	1.4881e-05	9.92949e-05	2.93288e-05	0	0
c14_190	Exo_endo_phos	PF03372.22	0	0	0	0.000128982	1.40359e-05	0	0
c14_40	none	none	0	0	1.47807e-05	9.86258e-05	2.91312e-05	0	0
c4_68	none	none	6.0707e-06	1.35207e-05	1.20388e-05	7.45918e-05	3.55906e-05	0	0
c6_8	NUDIX	PF00293.27	0	5.99095e-06	3.734e-05	7.11871e-05	2.62833e-05	0	0
c6_333	none	none	0	1.60801e-05	0	9.55357e-05	2.82185e-05	0	0
c1_276	CLP_protease	PF00574.22	0	0	0	0.000114166	1.68606e-05	8.70954e-06	0
c14_191	Pox_MCEL	PF03291.15	0	0	8.9456e-06	0.000114264	1.05785e-05	1.82147e-06	3.80102e-06
c4_75	CDP-OH_P_transf	PF01066.20	0	0	1.03465e-05	0.000108488	2.03918e-05	0	0
c1_140	Gln-synt_C	PF00120.23	0	0	1.0576e-05	9.57726e-05	2.08441e-05	5.38362e-06	5.61723e-06
c10_22	Aldedh	PF00171.21	0	7.78104e-06	1.38564e-05	9.57598e-05	2.0482e-05	0	0
c4_148	Peptidase_C48	PF02902.18	0	0	0	0.000120099	1.77369e-05	0	0
c4_153	Peptidase_M41	PF01434.17	0	3.70782e-06	9.90425e-06	8.4969e-05	3.90404e-05	0	0
c6_323	none	none	0	0	1.33206e-05	9.7348e-05	2.18779e-05	0	4.71665e-06
c10_47	none	none	0	0	2.01605e-05	9.60876e-05	1.9867e-05	0	0
c14_183	ubiquitin	PF00240.22	0	0	0	0.000118295	1.52867e-05	0	0
c4_24	none	none	0	0	0	8.78515e-05	4.54104e-05	0	0
c4_81	DctP	PF03480.12	0	1.09003e-05	2.42639e-05	7.86388e-05	1.43465e-05	4.94054e-06	0
c4_191	none	none	0	0	1.14481e-05	0.000109127	0	1.16551e-05	0
c4_203	none	none	0	0	0	0.000100522	3.1176e-05	0	0
c10_55	UCH	PF00443.28	0	2.04156e-05	1.81778e-05	7.50864e-05	1.79133e-05	0	0
c4_277	none	none	0	7.69116e-06	1.71204e-05	7.9966e-05	2.02454e-05	3.48599e-06	1.81863e-06
c7_10	SBP_bac_3	PF00497.19	0	2.92343e-05	8.67666e-06	5.78958e-05	3.42015e-05	0	0
c6_262	Rnonese_H	PF00075.23	0	0	7.92435e-06	9.06445e-05	3.1236e-05	0	0
c4_151	none	none	0	2.63982e-06	1.41028e-05	8.96214e-05	2.31626e-05	0	0
c9_9	none	none	0	1.5805e-05	9.38178e-06	8.94297e-05	1.38678e-05	0	0
c6_7	none	none	0	0	1.71135e-05	7.22435e-05	3.6138e-05	0	2.597e-06
c7_40	none	none	0	9.83817e-06	8.75983e-06	8.35011e-05	2.5897e-05	0	0
c12_21	AAA	PF00004.28	0	3.77602e-06	1.68107e-05	9.29417e-05	9.93961e-06	3.42294e-06	0
c10_57	ubiquitin	PF00240.22	0	0	5.70026e-06	9.2372e-05	2.80865e-05	0	0
c4_258	none	none	0	0	4.2841e-05	7.14652e-05	1.05544e-05	0	0
c14_119	none	none	0	0	1.07628e-05	9.74643e-05	1.59092e-05	0	0
c4_298	UQ_con	PF00179.25	0	0	1.40486e-05	9.59727e-05	1.15368e-05	2.38378e-06	0
c7_16	Topoisom_bac	PF01131.19	0	0	6.97074e-06	8.19513e-05	2.97669e-05	2.3656e-06	2.46825e-06
c6_178	ATP_bind_3	PF01171.19	0	0	1.93359e-05	9.21574e-05	1.14327e-05	0	0
c7_80	none	none	0	0	0	9.13485e-05	3.14787e-05	0	0
c4_224	none	none	0	0	0	0.000122035	0	0	0
c4_96	none	none	0	0	2.50968e-05	5.98074e-05	3.70973e-05	0	0
c6_13	none	none	0	0	1.00802e-05	7.68701e-05	3.47673e-05	0	0
c1_259	none	none	0	0	2.21413e-05	9.14578e-05	0	7.51388e-06	0
c8_7	none	none	0	0	0	0.000100329	2.07441e-05	0	0
c4_123	2OG-FeII_Oxy_2	PF13532.5	0	0	8.35922e-06	8.76507e-05	1.64751e-05	8.51039e-06	0
c6_142	AAA	PF00004.28	0	5.40711e-06	0	9.63745e-05	1.89775e-05	0	0
c14_137	XPG_I	PF00867.17	0	5.58359e-06	9.94316e-06	8.05638e-05	1.95969e-05	5.06148e-06	0
c7_35	none	none	0	0	0	5.04228e-05	5.2127e-05	1.79512e-05	0
c4_89	none	none	0	0	7.38042e-06	9.8493e-05	1.4546e-05	0	0
c4_109	noneD_binding_8	PF13450.5	0	0	2.41837e-05	7.49208e-05	1.48948e-05	3.07763e-06	3.21117e-06
c6_186	none	none	0	3.33503e-05	1.97966e-05	4.71766e-05	1.95084e-05	0	0
c8_16	VIT1	PF01988.18	0	0	5.06406e-05	6.896e-05	0	0	0
c1_205	Bac_rhodopsin	PF01036.17	0	8.56564e-06	7.62677e-06	7.27005e-05	2.25473e-05	0	8.10162e-06
c1_281	PP2C	PF00481.20	0	0	0	0.000107253	5.83568e-06	6.02896e-06	0
c7_14	zf-RING_2	PF13639.5	0	0	8.8446e-06	9.27401e-05	1.74317e-05	0	0
c11_13	Peptidase_S49	PF01343.17	0	0	3.40177e-05	6.48532e-05	2.01135e-05	0	0
c14_139	DnoneJ	PF00226.30	0	0	1.96723e-05	7.50087e-05	2.42324e-05	0	0
c1_9	none	none	0	0	0	9.64027e-05	2.21469e-05	0	0
c1_318	FA_hydroxylase	PF04116.12	0	0	6.48953e-06	0.000105162	6.39507e-06	0	0
c4_157	none	none	0	2.22818e-05	1.19037e-05	6.80818e-05	1.56406e-05	0	0
c8_11	DAHP_synth_1	PF00793.19	0	0	6.67923e-06	5.73015e-05	3.94921e-05	0	1.41902e-05
c4_80	none	none	0	4.12505e-06	1.10187e-05	8.05257e-05	2.17167e-05	0	0
c6_111	Dnone_ligase_aden	PF01653.17	0	0	1.40247e-05	8.2886e-05	1.38206e-05	2.85566e-06	2.97957e-06
c4_293	Dnone_pol3_delta2	PF13177.5	0	0	5.47817e-06	8.87731e-05	2.15938e-05	0	0
c14_186	cobW	PF02492.18	0	0	8.58833e-06	8.18664e-05	2.539e-05	0	0
c6_16	none	none	0	0	0	8.16745e-05	3.3774e-05	0	0
c7_79	Rhomboid	PF01694.21	0	2.18781e-05	0	7.42759e-05	1.91966e-05	0	0
c1_366	none	none	0	0	0	7.60315e-05	3.93006e-05	0	0
c6_344	tRnone-synt_2	PF00152.19	0	3.95041e-06	3.51742e-06	9.05282e-05	1.73311e-05	0	0
c6_217	Pyrophosphatase	PF00719.18	0	0	7.99366e-06	9.14373e-05	1.57546e-05	0	0
c6_268	none	none	0	0	8.93588e-06	7.66613e-05	2.93527e-05	0	0
c10_26	none	none	0	0	1.84015e-05	9.64746e-05	0	0	0
c12_8	none	none	0	0	5.41328e-06	8.77215e-05	1.60035e-05	5.51117e-06	0
c1_33	CDP-OH_P_transf	PF01066.20	0	0	7.89014e-06	7.5211e-05	3.11012e-05	0	0
c2_23	tRnone-synt_2b	PF00587.24	0	0	2.71692e-05	7.76953e-05	8.92459e-06	0	0
c6_254	HTH_3	PF01381.21	0	0	2.9091e-05	4.15955e-05	4.30013e-05	0	0
c14_24	IF4E	PF01652.17	0	0	0	9.37889e-05	1.29278e-05	6.67801e-06	0
c1_294	Thioredoxin	PF00085.19	0	0	6.51265e-06	8.07045e-05	2.56714e-05	0	0
c6_52	none	none	0	2.55548e-05	0	7.59132e-05	1.12113e-05	0	0
c4_127	none	none	0	0	1.06479e-05	9.13485e-05	1.04929e-05	0	0
c7_33	Aminotran_1_2	PF00155.20	0	2.31009e-06	1.64551e-05	7.05844e-05	1.62156e-05	6.28224e-06	0
c1_347	DUF3522	PF12036.7	0	0	1.64181e-05	7.04259e-05	1.61792e-05	0	8.72015e-06
c14_168	none	none	0	0	3.86717e-06	8.10985e-05	2.66762e-05	0	0
c12_3	ThiF	PF00899.20	0	0	1.2838e-05	8.39144e-05	1.44584e-05	0	0
c4_205	none	none	0	4.14541e-06	1.59945e-05	7.50592e-05	1.21244e-05	1.25259e-06	2.61389e-06
c6_91	none	none	0	0	0	8.26793e-05	2.84912e-05	0	0
c4_128	none	none	0	0	0	8.47191e-05	2.62747e-05	0	0
c6_245	none	none	7.23875e-06	0	0	8.21021e-05	2.12193e-05	0	0
c6_60	none	none	0	0	6.71467e-05	2.13354e-05	2.20565e-05	0	0
c14_16	none	none	0	1.3345e-05	0	8.49485e-05	5.85464e-06	0	6.31101e-06
c2_16	HAD_2	PF13419.5	0	9.09704e-06	0	7.72107e-05	2.39461e-05	0	0
c4_197	Dnone_pol3_delta2	PF13177.5	0	0	1.89091e-05	6.75927e-05	1.86339e-05	0	5.02161e-06
c1_232	none	none	0	3.25169e-06	1.15811e-05	6.76165e-05	2.28251e-05	0	4.6133e-06
c1_272	Glutaredoxin	PF00462.23	0	0	9.53678e-06	9.09072e-05	9.39798e-06	0	0
c12_12	Rnonese_T	PF00929.23	8.13295e-06	0	1.61284e-05	6.14961e-05	2.38405e-05	0	0
c1_316	Radical_SAM_C	PF16199.4	0	0	1.13416e-05	8.91916e-05	2.79412e-06	0	6.02385e-06
c6_236	none	none	0	0	1.02883e-05	7.84565e-05	2.02771e-05	0	0
c6_332	Thymidylat_synt	PF00303.18	0	0	3.91689e-06	9.33423e-05	1.15796e-05	0	0
c6_331	none	none	0	0	1.59873e-05	6.8578e-05	1.57546e-05	0	8.49135e-06
c1_46	tRnone-synt_1	PF00133.21	0	0	1.55246e-05	7.72812e-05	1.1899e-05	3.51231e-06	0
c14_179	DUF378	PF04070.11	0	0	2.02349e-05	5.78653e-05	2.99105e-05	0	0
c6_165	none	none	0	1.75963e-05	0	7.46738e-05	1.54395e-05	0	0
c6_87	Thioredoxin	PF00085.19	0	2.98242e-05	1.32776e-05	3.79697e-05	1.30843e-05	1.35177e-05	0
c14_177	none	none	0	0	0	6.61667e-05	2.73612e-05	1.41337e-05	0
c4_220	none	none	0	0	0	7.94e-05	2.73612e-05	0	0
c4_257	none	none	0	0	3.13351e-05	5.9739e-05	1.54395e-05	0	0
c1_34	TTL	PF03133.14	0	0	9.60359e-06	7.78125e-05	1.41957e-05	4.88863e-06	0
c1_106	none	none	0	1.10569e-05	9.84497e-06	5.6307e-05	2.9105e-05	0	0
c6_42	tRnone-synt_2	PF00152.19	0	3.69448e-06	3.28953e-06	8.77988e-05	9.72496e-06	0	0
c6_218	zf-RING_2	PF13639.5	0	8.60153e-06	0	6.57046e-05	3.0189e-05	0	0
c14_174	none	none	0	0	2.70131e-05	7.72488e-05	0	0	0
c14_78	none	none	0	1.04918e-05	1.86836e-05	1.78098e-05	4.60293e-05	0	9.92345e-06
c4_74	dCMP_cyt_deam_1	PF00383.22	0	0	0	0.000102717	0	0	0
c1_295	Lipase_3	PF01764.24	0	2.52924e-05	1.12601e-05	4.83003e-05	1.66443e-05	0	0
c4_196	Mito_carr	PF00153.26	0	0	1.29791e-05	6.8046e-05	1.27901e-05	0	6.89357e-06
c1_244	none	none	0	0	9.4383e-06	5.39811e-05	3.72037e-05	0	0
c14_34	Ank_2	PF12796.6	8.7093e-06	0	1.72713e-05	6.58541e-05	8.50998e-06	0	0
c4_38	Dnone_pol_B_palm	PF14792.5	0	0	1.55051e-05	6.8973e-05	1.01863e-05	0	5.49016e-06
c1_299	SpoU_methylase	PF00588.18	0	8.86143e-06	1.57803e-05	7.5211e-05	0	0	0
c6_37	ABC_tran	PF00005.26	0	0	9.97632e-06	7.60776e-05	9.83112e-06	3.38558e-06	0
c1_211	PAP2	PF01569.20	0	1.26203e-05	0	6.42684e-05	2.21469e-05	0	0
c14_14	S6PP	PF05116.12	0	0	1.00067e-05	6.67704e-05	2.21873e-05	0	0
c14_30	none	none	0	7.11166e-06	0	6.63959e-05	1.248e-05	1.28933e-05	0
c14_3	none	none	0	3.73367e-06	1.99466e-05	5.86254e-05	1.31042e-05	1.69227e-06	1.76571e-06
c4_221	Pox_A32	PF04665.11	0	0	6.35417e-06	6.66267e-05	1.87851e-05	6.46908e-06	0
c2_18	TPP_enzyme_N	PF02776.17	0	0	1.18951e-05	6.51978e-05	1.46525e-05	0	6.31786e-06
c6_167	dCMP_cyt_deam_1	PF00383.22	0	0	0	6.93258e-05	2.86676e-05	0	0
c8_6	none	none	0	0	6.80354e-06	8.43091e-05	6.70451e-06	0	0
c1_128	none	none	0	0	9.95218e-06	4.74335e-05	1.96147e-05	1.01321e-05	1.05718e-05
c4_7	none	none	0	0	8.43639e-06	7.23762e-05	1.66272e-05	0	0
c4_269	TK	PF00265.17	0	1.09977e-05	0	6.53396e-05	9.64971e-06	0	1.04019e-05
c6_263	none	none	0	0	0	8.51677e-05	1.10058e-05	0	0
c4_180	IDO	PF01231.17	0	0	2.37045e-05	4.89576e-05	2.33595e-05	0	0
c1_65	none	none	0	0	0	8.18877e-05	1.41092e-05	0	0
c14_46	UDPG_MGDP_dh	PF00984.18	0	0	1.30253e-05	3.72482e-05	3.20893e-05	6.63042e-06	6.91813e-06
c1_50	Phosphodiest	PF01663.21	0	5.29552e-06	0	7.19129e-05	1.85859e-05	0	0
c2_48	none	none	0	4.9868e-06	0	5.50228e-05	3.0629e-05	0	4.71665e-06
c1_320	Arginonese	PF00491.20	0	0	7.06656e-06	6.73604e-05	2.08911e-05	0	0
c1_314	none	none	0	0	0	8.12513e-05	1.39996e-05	0	0
c4_41	Dnone_pol_B	PF00136.20	0	1.60299e-06	7.13645e-06	6.80266e-05	1.82847e-05	0	0
c1_300	none	none	0	0	9.89829e-06	8.49179e-05	0	0	0
c4_287	SNF2_N	PF00176.22	0	0	1.63593e-05	6.54955e-05	1.2897e-05	0	0
c4_267	none	none	0	0	1.21994e-05	6.39587e-05	1.20219e-05	0	6.47949e-06
c1_44	none	none	0	0	1.24912e-05	5.95349e-05	2.2157e-05	0	0
c10_18	2OG-FeII_Oxy	PF03171.19	0	0	1.14721e-05	6.5613e-05	1.69576e-05	0	0
c14_141	none	none	0	0	1.60811e-05	4.59868e-05	3.16941e-05	0	0
c7_20	Methyltransf_11	PF08241.11	0	0	0	8.53098e-05	0	8.28311e-06	0
c14_86	none	none	0	8.89985e-06	7.92435e-06	4.53223e-05	3.1236e-05	0	0
c6_275	none	none	0	0	9.29432e-05	0	0	0	0
c1_159	none	none	0	0	0	8.39032e-05	8.67389e-06	0	0
c4_194	none	none	0	0	0	8.0066e-05	1.18246e-05	0	0
c6_176	none	none	0	0	2.20448e-05	4.20275e-05	2.1724e-05	5.61087e-06	0
c6_130	Abhydrolase_1	PF00561.19	0	0	0	7.87406e-05	1.25234e-05	0	0
c14_165	none	none	0	0	1.28825e-05	6.13998e-05	1.69267e-05	0	0
c14_197	L1R_F9L	PF02442.16	0	0	7.26311e-06	6.9234e-05	1.43148e-05	0	0
c14_104	Mito_fiss_Elm1	PF06258.10	0	0	6.28859e-06	7.19335e-05	1.23941e-05	0	0
c10_5	none	none	0	1.27774e-06	1.47899e-05	6.07306e-05	1.12113e-05	1.15826e-06	1.20852e-06
c1_147	FAD_oxidored	PF12831.6	0	0	3.75593e-06	7.1605e-05	1.4805e-05	0	0
c1_227	none	none	0	8.61356e-06	1.15042e-05	5.48304e-05	1.51156e-05	0	0
c14_149	CLP_protease	PF00574.22	0	1.69895e-05	1.51273e-05	5.04692e-05	7.45357e-06	0	0
c10_19	DSHCT	PF08148.11	0	0	1.13721e-05	6.07054e-05	1.79306e-05	0	0
c6_238	Bax1-I	PF01027.19	0	0	0	6.81508e-05	1.40908e-05	0	7.59461e-06
c6_177	none	none	0	0	0	4.90353e-05	4.05541e-05	0	0
c14_189	DEAD	PF00270.28	0	0	1.27231e-05	5.4576e-05	1.56724e-05	6.47658e-06	0
c14_140	none	none	0	1.26983e-05	0	4.31107e-05	3.34258e-05	0	0
c6_329	OmpH	PF03938.13	0	0	1.19818e-05	5.71067e-05	1.96789e-05	0	0
c1_32	none	none	0	0	1.50237e-05	4.2963e-05	1.4805e-05	0	1.59591e-05
c1_4	Aminotran_1_2	PF00155.20	1.97022e-06	0	5.86069e-06	5.95901e-05	1.92513e-05	0	2.07519e-06
c14_181	zf-C3HC4_3	PF13920.5	1.66278e-06	0	3.29744e-06	6.91507e-05	1.46225e-05	0	0
c14_204	His_Phos_1	PF00300.21	0	0	2.73272e-05	4.3415e-05	1.79529e-05	0	0
c4_285	none	none	0	0	1.64922e-05	3.14416e-05	4.06303e-05	0	0
c2_40	PNK3P	PF08645.10	0	0	1.01643e-05	5.3289e-05	2.50409e-05	0	0
c1_149	DAHP_synth_1	PF00793.19	0	0	1.52042e-05	5.79723e-05	1.49829e-05	0	0
c6_25	Mito_carr	PF00153.26	0	0	8.28346e-06	5.52722e-05	2.44887e-05	0	0
c7_98	adh_short	PF00106.24	0	0	6.48953e-06	6.186e-05	1.91852e-05	0	0
c1_215	Peptidase_S9_N	PF02897.14	0	0	7.59859e-06	7.24319e-05	7.48799e-06	0	0
c6_136	none	none	0	1.00797e-05	0	6.84408e-05	8.84425e-06	0	0
c1_130	none	none	0	0	0	6.47996e-05	2.23299e-05	0	0
c1_202	none	none	0	0	0	7.77595e-05	0	9.22779e-06	0
c2_2	Peptidase_M3	PF01432.19	0	0	1.49283e-05	5.21768e-05	1.71628e-05	2.53304e-06	0
c7_52	Pkinonese	PF00069.24	0	0	7.21533e-06	6.53396e-05	1.42206e-05	0	0
c6_1	ResIII	PF04851.14	0	3.56819e-06	1.11198e-05	5.75412e-05	1.25234e-05	0	1.68745e-06
c12_4	none	none	0	0	0	5.32298e-05	3.30173e-05	0	0
c1_173	GIY-YIG	PF01541.23	0	0	2.2231e-05	5.65099e-05	7.30248e-06	0	0
c4_302	FA_desaturase	PF00487.23	0	0	4.27408e-06	7.33352e-05	8.42375e-06	0	0
c1_150	PQ-loop	PF04193.13	0	1.59552e-05	2.84127e-05	2.70838e-05	0	1.44632e-05	0
c7_54	Asp_Arg_Hydrox	PF05118.14	0	0	7.47091e-06	7.83363e-05	0	0	0
c1_330	SOR_SNZ	PF01680.16	0	0	0	6.66267e-05	1.87851e-05	0	0
c1_133	none	none	0	0	0	7.2768e-05	1.25379e-05	0	0
c2_29	AAA	PF00004.28	0	0	7.66944e-06	5.48304e-05	2.26734e-05	0	0
c4_282	Ank_2	PF12796.6	0	9.27514e-06	4.12926e-06	5.51057e-05	1.22075e-05	0	4.38634e-06
c10_21	none	none	0	0	2.18472e-05	4.16507e-05	2.15292e-05	0	0
c1_68	none	none	0	0	1.23784e-05	2.35989e-05	4.87931e-05	0	0
c4_66	none	none	0	0	0	8.47649e-05	0	0	0
c1_208	Capsid_N	PF16903.4	4.38226e-06	0	1.73808e-05	4.55617e-05	1.71278e-05	0	0
c6_12	Evr1_Alr	PF04777.12	0	0	0	7.17689e-05	1.23658e-05	0	0
c14_67	none	none	0	0	1.44433e-05	5.04819e-05	1.89775e-05	0	0
c4_44	none	none	0	0	0	7.42759e-05	9.59829e-06	0	0
c7_85	Snonese	PF00565.16	0	0	2.15468e-05	4.10779e-05	2.12331e-05	0	0
c4_145	none	none	0	0	2.87102e-05	5.47347e-05	0	0	0
c1_145	SNF2_N	PF00176.22	0	0	1.05333e-05	5.82358e-05	1.4532e-05	0	0
c7_60	Asp_Arg_Hydrox	PF05118.14	0	1.04385e-05	1.85886e-05	5.31576e-05	0	0	0
c1_114	Peptidase_C26	PF07722.12	0	0	5.01248e-06	6.68924e-05	4.93952e-06	0	5.32455e-06
c2_5	none	none	0	2.72911e-05	0	3.08843e-05	2.39461e-05	0	0
c7_90	none	none	0	0	7.14948e-06	7.49659e-05	0	0	0
c1_274	none	none	0	1.3273e-05	0	3.37963e-05	3.49386e-05	0	0
c6_195	Glucosamine_iso	PF01182.19	0	4.13335e-06	0	6.3147e-05	1.45069e-05	0	0
c4_152	none	none	0	0	1.60458e-05	4.97097e-05	1.18592e-05	4.08399e-06	0
c1_287	Trypsin_2	PF13365.5	0	8.43657e-06	1.50237e-05	3.58025e-05	2.22075e-05	0	0
c1_171	none	none	0	0	0	7.30505e-05	8.39105e-06	0	0
c1_317	none	none	0	0	1.40247e-05	6.01592e-05	6.91028e-06	0	0
c6_222	Asp_protease	PF09668.9	0	0	9.29432e-06	4.4298e-05	2.74771e-05	0	0
c9_12	none	none	0	0	2.43935e-05	4.6505e-05	9.61537e-06	0	0
c1_162	Pribosyltran_N	PF13793.5	0	0	5.51121e-06	5.77878e-05	1.0862e-05	5.61087e-06	0
c14_178	Peptidase_M16_M	PF16187.4	0	4.57896e-06	1.01927e-05	4.85796e-05	1.60709e-05	0	0
c1_368	PagL	PF09411.9	0	0	1.32776e-05	2.53132e-05	2.61687e-05	1.35177e-05	0
c6_234	DAGAT	PF03982.12	0	5.97352e-06	5.31877e-06	4.563e-05	1.57241e-05	5.41495e-06	0
c1_282	NUDIX	PF00293.27	0	0	2.01235e-05	4.79557e-05	9.9153e-06	0	0
c1_16	PhyH	PF05721.12	0	0	5.75409e-06	6.58195e-05	5.67034e-06	0	0
c7_59	Aminotran_3	PF00202.20	0	0	9.26292e-06	3.09039e-05	2.73843e-05	4.71521e-06	4.91982e-06
c7_48	2_5_Rnone_ligase2	PF13563.5	0	0	0	3.7538e-05	2.9105e-05	0	1.04579e-05
c1_124	none	none	0	0	0	6.81064e-05	8.80104e-06	0	0
c10_37	Ammonium_transp	PF00909.20	0	0	7.93582e-06	4.53878e-05	2.34609e-05	0	0
c4_15	Citrate_bind	PF16114.4	0	6.02219e-06	3.57474e-06	4.60018e-05	2.11363e-05	0	0
c1_199	Acetyltransf_1	PF00583.24	0	1.45252e-05	0	4.93129e-05	1.27449e-05	0	0
c1_60	none	none	0	0	2.62376e-05	5.00207e-05	0	0	0
c6_40	none	none	0	0	8.80201e-06	5.87322e-05	8.67389e-06	0	0
c1_121	zf-AN1	PF01428.15	0	0	1.5803e-05	6.02555e-05	0	0	0
c14_94	Methyltransf_15	PF09445.9	0	0	0	4.07312e-05	2.80719e-05	7.25041e-06	0
c14_109	GDP_Man_Dehyd	PF16363.4	0	0	0	4.23252e-05	2.18779e-05	0	1.17916e-05
c1_356	tRnone-synt_1g	PF09334.10	0	3.66153e-06	3.2602e-06	4.97233e-05	1.92765e-05	0	0
c6_279	PT	PF04886.11	0	0	8.75051e-06	5.83886e-05	8.62314e-06	0	0
c14_147	Ank_2	PF12796.6	0	0	9.25866e-06	5.1349e-05	1.32711e-05	1.71383e-06	0
c6_159	Acyl-CoA_dh_1	PF00441.23	0	0	1.45971e-05	4.17431e-05	1.91795e-05	0	0
c4_251	DnoneJ	PF00226.30	0	7.11166e-06	1.26643e-05	2.4144e-05	3.12e-05	0	0
c13_3	none	none	0	0	2.8912e-05	4.59329e-05	0	0	0
c1_75	none	none	0	0	2.52703e-05	3.61325e-05	0	0	1.34218e-05
c14_129	none	none	0	0	0	4.93129e-05	2.54898e-05	0	0
c1_40	BBP2	PF07642.10	0	0	1.10893e-05	5.81384e-05	5.46394e-06	0	0
c1_37	Peptidase_C1	PF00112.22	0	0	0	5.66324e-05	1.75639e-05	0	0
c6_162	none	none	0	0	0	7.39693e-05	0	0	0
c14_143	none	none	0	0	0	4.86248e-05	2.51341e-05	0	0
c8_18	Dnone_pol3_alpha	PF07733.11	0	0	2.2474e-05	4.28456e-05	8.30508e-06	0	0
c7_49	PRORP	PF16953.4	0	0	4.25419e-06	6.08282e-05	8.38454e-06	0	0
c1_340	Thioredoxin_2	PF13098.5	0	1.37165e-05	2.44261e-05	2.32836e-05	1.20353e-05	0	0
c14_110	GDP_Man_Dehyd	PF16363.4	0	0	5.08216e-06	5.81335e-05	5.00819e-06	5.17406e-06	0
c1_338	none	none	0	1.20287e-05	0	6.12559e-05	0	0	0
c14_107	none	none	0	2.67769e-05	0	2.27268e-05	2.34949e-05	0	0
c6_229	DUF4346	PF14251.5	0	0	0	3.58025e-05	3.70126e-05	0	0
c4_288	Dnone_pol3_delta2	PF13177.5	0	0	5.39729e-06	5.14485e-05	1.59562e-05	0	0
c4_67	Carboxyl_trans	PF01039.21	0	4.97204e-06	8.85412e-06	4.07933e-05	1.45421e-05	1.50237e-06	1.56756e-06
c4_274	none	none	0	0	0	7.21984e-05	0	0	0
c6_132	SBP_bac_8	PF13416.5	0	0	1.8479e-05	3.08258e-05	2.27626e-05	0	0
c14_172	AP_endonuc_2	PF01261.23	0	0	0	5.35814e-05	1.84641e-05	0	0
c6_107	Bac_Dnone_binding	PF00216.20	0	0	0	3.53187e-05	3.65124e-05	0	0
c11_12	none	none	0	0	0	6.12559e-05	1.05544e-05	0	0
c4_50	none	none	0	3.22332e-06	4.78337e-06	4.46844e-05	1.69695e-05	1.94795e-06	0
c4_231	Pox_VLTF3	PF04947.13	0	0	1.38243e-05	4.83183e-05	4.54104e-06	4.69144e-06	0
c8_5	GDC-P	PF02347.15	0	0	4.22307e-06	5.63576e-05	1.0404e-05	0	0
c4_182	none	none	0	0	1.81578e-05	3.4617e-05	1.78935e-05	0	0
c6_304	Metallophos	PF00149.27	0	0	8.5682e-06	4.90047e-05	8.44349e-06	4.36157e-06	0
c7_100	PP-binding	PF00550.24	0	0	1.44687e-05	4.1376e-05	1.42581e-05	0	0
c1_334	zf-C3HC4_3	PF13920.5	0	0	0	6.28097e-05	7.21473e-06	0	0
c1_289	MutS_V	PF00488.20	0	1.96701e-06	1.22598e-05	4.00677e-05	1.55332e-05	0	0
c6_289	none	none	0	0	0	2.27268e-05	4.69899e-05	0	0
c10_52	LCM	PF04072.13	0	3.4933e-06	9.33123e-06	4.1509e-05	1.53257e-05	0	0
c6_41	none	none	0	0	1.53317e-05	4.38439e-05	5.03619e-06	0	5.42876e-06
c6_57	none	none	0	0	1.1921e-05	4.54536e-05	5.87374e-06	0	6.33159e-06
c14_170	none	none	0	6.15254e-06	0	4.69975e-05	1.61953e-05	0	0
c1_201	none	none	0	0	0	4.84895e-05	1.00257e-05	0	1.08072e-05
c6_196	none	none	0	0	2.00133e-05	1.90773e-05	2.9583e-05	0	0
c14_5	Pkinonese	PF00069.24	0	4.16691e-06	7.42037e-06	4.59764e-05	7.31236e-06	3.77728e-06	0
c6_315	tRnone-synt_1b	PF00579.24	0	0	5.05406e-06	4.3359e-05	1.49415e-05	5.14545e-06	0
c6_157	none	none	0	0	0	6.84782e-05	0	0	0
c1_256	none	none	0	0	1.18055e-05	4.50133e-05	1.16337e-05	0	0
c1_30	PALP	PF00291.24	0	0	3.53784e-06	5.39578e-05	1.0459e-05	0	0
c4_56	none	none	0	0	0	5.78653e-05	9.97018e-06	0	0
c2_30	none	none	0	0	7.01234e-06	5.34749e-05	0	7.13915e-06	0
c1_327	Aldedh	PF00171.21	0	0	3.68773e-06	4.92134e-05	1.45362e-05	0	0
c14_200	DnoneJ_C	PF01556.17	0	0	8.6698e-06	3.71893e-05	2.1359e-05	0	0
c6_123	PEPCK_ATP	PF01293.19	0	0	6.94133e-06	4.9625e-05	6.8403e-06	0	3.68675e-06
c4_295	none	none	0	0	8.63567e-06	3.2927e-05	2.55299e-05	0	0
c1_322	Aminotran_5	PF00266.18	0	0	0	6.19445e-05	4.92601e-06	0	0
c1_231	Carb_anhydrase	PF00194.20	0	0	6.28859e-06	4.19612e-05	1.85912e-05	0	0
c6_345	Sacchrp_dh_noneDP	PF03435.17	0	4.30678e-06	0	5.48304e-05	7.55781e-06	0	0
c6_99	none	none	0	0	3.40599e-05	3.24669e-05	0	0	0
c14_185	HMGL-like	PF00682.18	4.84274e-06	1.07858e-05	4.8018e-06	3.66176e-05	9.46381e-06	0	0
c1_55	none	none	0	0	0	6.61667e-05	0	0	0
c7_50	Lysine_decarbox	PF03641.13	0	0	0	6.60472e-05	0	0	0
c10_40	none	none	0	0	0	4.57377e-05	2.02644e-05	0	0
c4_92	LRR_4	PF12799.6	3.27631e-06	0	3.24861e-06	4.02566e-05	1.92079e-05	0	0
c1_137	ELO	PF01151.17	0	0	6.85456e-06	5.22717e-05	6.7548e-06	0	0
c6_193	zf-RING_2	PF13639.5	0	0	1.92747e-05	3.67463e-05	9.49708e-06	0	0
c6_249	Glyoxalase	PF00903.24	0	0	0	6.5476e-05	0	0	0
c14_196	HD	PF01966.21	0	0	8.46896e-06	5.24735e-05	4.17285e-06	0	0
c6_63	none	none	0	0	1.02786e-05	3.91915e-05	1.0129e-05	0	5.45929e-06
c14_124	none	none	0	0	2.23822e-05	4.26707e-05	0	0	0
c10_25	ILVD_EDD	PF00920.20	0	0	0	5.84213e-05	6.35745e-06	0	0
c6_273	EamA	PF00892.19	0	0	1.31819e-05	2.51306e-05	1.299e-05	1.34202e-05	0
c6_135	Glutaminonese	PF04960.14	0	0	6.99445e-06	5.00048e-05	3.44632e-06	3.56047e-06	0
c6_150	zf-RING_2	PF13639.5	0	0	0	5.79509e-05	5.99095e-06	0	0
c6_45	Formyl_trans_N	PF00551.18	0	9.09704e-06	0	3.86054e-05	1.59641e-05	0	0
c14_47	GDP_Man_Dehyd	PF16363.4	0	6.62938e-06	5.90275e-06	4.50133e-05	5.81683e-06	0	0
c4_244	Capsid_NCLDV	PF04451.11	0	5.86068e-07	8.34928e-06	4.17835e-05	1.20845e-05	2.65633e-07	2.7716e-07
c4_114	Pantoate_ligase	PF02569.14	0	0	6.55939e-06	4.37681e-05	1.29278e-05	0	0
c4_275	Peptidase_M24	PF00557.23	0	0	1.08266e-05	4.12807e-05	5.33449e-06	0	5.75031e-06
c4_245	none	none	0	0	0	4.16507e-05	2.15292e-05	0	0
c8_14	CTP_transf_3	PF02348.18	0	7.16127e-06	6.37634e-06	3.64686e-05	6.28353e-06	0	6.77333e-06
c8_8	zf-RING_2	PF13639.5	0	0	1.29027e-05	2.45984e-05	2.54298e-05	0	0
c1_49	none	none	0	0	2.12957e-05	2.02997e-05	2.09858e-05	0	0
c1_25	Exo_endo_phos	PF03372.22	0	1.27246e-05	0	2.15999e-05	2.79124e-05	0	0
c6_145	none	none	0	0	8.09993e-06	5.40475e-05	0	0	0
c6_336	DSPc	PF00782.19	0	0	1.07103e-05	4.08372e-05	1.05544e-05	0	0
c1_153	none	none	1.04941e-05	0	0	1.98374e-05	2.05079e-05	0	1.10533e-05
c11_9	none	none	9.23273e-06	0	0	4.36324e-05	9.02143e-06	0	0
c9_8	none	none	0	0	1.28123e-05	4.8852e-05	0	0	0
c6_199	CorA	PF01544.17	0	0	1.14721e-05	3.28065e-05	1.13051e-05	5.83976e-06	0
c6_278	none	none	0	0	0	5.46842e-05	6.65088e-06	0	0
c14_180	NYN	PF01936.17	0	0	1.15445e-05	4.40182e-05	5.68825e-06	0	0
c10_50	none	none	0	0	3.97654e-06	4.92771e-05	3.91866e-06	4.04845e-06	0
c6_301	none	none	0	2.21138e-05	1.96899e-05	0	1.94034e-05	0	0
c1_245	none	none	0	0	0	4.55196e-05	1.5686e-05	0	0
c4_87	none	none	0	0	0	5.2098e-05	8.97647e-06	0	0
c10_17	Cupin_8	PF13621.5	0	0	0	4.53223e-05	1.5618e-05	0	0
c4_2	none	none	0	0	6.3103e-06	4.21061e-05	1.24369e-05	0	0
c6_183	none	none	0	0	0	5.38883e-05	6.96371e-06	0	0
c4_252	Patatin	PF01734.21	0	0	5.77226e-06	5.50228e-05	0	0	0
c6_219	none	none	0	1.38087e-05	0	4.68804e-05	0	0	0
c6_179	none	none	0	0	2.08108e-05	3.96749e-05	0	0	0
c1_119	UQ_con	PF00179.25	0	0	6.93255e-06	3.30415e-05	2.0495e-05	0	0
c14_42	DSPc	PF00782.19	0	0	2.47569e-05	3.53984e-05	0	0	0
c6_156	none	none	0	0	1.53819e-05	2.93249e-05	7.57901e-06	7.83003e-06	0
c1_72	SHMT	PF00464.18	0	0	1.23598e-05	3.1418e-05	1.62399e-05	0	0
c6_258	Pkinonese	PF00069.24	0	0	0	4.62581e-05	1.36633e-05	0	0
c7_84	none	none	0	0	0	3.37237e-05	2.61476e-05	0	0
c14_128	2C_adapt	PF08793.9	0	0	2.70131e-05	1.28748e-05	1.99649e-05	0	0
c14_29	FAD_binding_4	PF01565.22	0	0	4.12926e-06	3.93612e-05	1.62766e-05	0	0
c7_64	none	none	0	0	2.5907e-05	1.64635e-05	8.50998e-06	8.79183e-06	0
c14_44	HSP70	PF00012.19	0	0	6.83179e-06	3.69028e-05	1.34647e-05	0	2.41905e-06
c4_217	GBP	PF02263.18	0	0	3.39966e-06	2.59252e-05	3.01516e-05	0	0
c2_15	none	none	0	0	5.57848e-06	3.19054e-05	2.19892e-05	0	0
c6_39	MlaC	PF05494.11	0	0	8.75983e-06	3.34004e-05	1.72647e-05	0	0
c7_96	none	none	0	0	0	5.89974e-05	0	0	0
c6_96	PP2C	PF00481.20	0	7.47414e-06	6.65492e-06	3.17182e-05	1.31161e-05	0	0
c14_55	none	none	0	0	6.80354e-06	4.53972e-05	6.70451e-06	0	0
c1_197	Glyco_transf_8	PF01501.19	0	0	0	3.47705e-05	2.39638e-05	0	0
c10_23	none	none	0	0	0	4.36811e-05	1.50525e-05	0	0
c1_48	zf-RING_2	PF13639.5	0	0	6.80354e-06	5.18825e-05	0	0	0
c14_193	none	none	0	0	1.99405e-05	1.90079e-05	1.96503e-05	0	0
c1_115	none	none	0	0	1.01174e-05	4.82211e-05	0	0	0
c4_117	Orn_Arg_deC_N	PF02784.15	0	0	0	3.31733e-05	1.95969e-05	5.06148e-06	0
c4_246	Capsid_N	PF16903.4	0	0	7.46583e-06	3.91415e-05	1.10357e-05	0	0
c7_81	none	none	0	7.26261e-06	1.29331e-05	2.46564e-05	1.27449e-05	0	0
c4_22	none	none	0	0	4.99877e-06	5.24146e-05	0	0	0
c14_198	Pox_G9-A16	PF03003.15	0	1.29249e-05	0	2.74248e-05	1.7011e-05	0	0
c6_110	Pantoate_transf	PF02548.14	0	0	1.18822e-05	4.53059e-05	0	0	0
c4_106	none	none	0	0	2.91684e-05	2.78041e-05	0	0	0
c4_306	DHHA1	PF02272.18	0	0	0	4.37681e-05	1.29278e-05	0	0
c4_86	none	none	0	0	0	5.65099e-05	0	0	0
c3_4	MIOX	PF05153.14	0	0	9.65998e-06	3.37633e-05	1.26925e-05	0	0
c1_246	none	none	0	0	2.87102e-05	2.73674e-05	0	0	0
c1_271	FMO-like	PF00743.18	0	3.40636e-06	6.06599e-06	4.3367e-05	2.98885e-06	0	0
c2_33	Peripla_BP_6	PF13458.5	0	0	1.73808e-05	8.28394e-06	2.56918e-05	4.42378e-06	0
c1_275	none	none	0	5.29552e-06	1.41453e-05	2.69673e-05	9.29293e-06	0	0
c6_247	adh_short	PF00106.24	0	0	1.27973e-05	3.65963e-05	6.30553e-06	0	0
c7_44	OTU	PF02338.18	0	0	8.24609e-06	3.9302e-05	8.12607e-06	0	0
c6_101	none	none	0	1.2467e-05	1.11005e-05	2.11626e-05	1.09389e-05	0	0
c1_45	none	none	0	1.14156e-05	5.08216e-06	2.90667e-05	1.00164e-05	0	0
c7_102	none	none	0	0	9.5534e-06	4.09795e-05	4.70717e-06	0	0
c14_43	DnoneJ	PF00226.30	0	0	6.26703e-06	3.58434e-05	6.17581e-06	0	6.65721e-06
c4_207	GCV_H	PF01597.18	0	0	1.40968e-05	2.68749e-05	1.38916e-05	0	0
c4_79	none	none	0	0	2.4016e-05	2.28927e-05	7.88881e-06	0	0
c3_1	none	none	0	8.9386e-06	0	3.7933e-05	7.84301e-06	0	0
c4_43	none	none	0	0	0	3.59874e-05	1.86018e-05	0	0
c6_197	ACOX	PF01756.18	0	0	1.12716e-05	3.76055e-05	5.55379e-06	0	0
c10_39	none	none	0	0	1.95565e-06	4.47404e-05	7.70875e-06	0	0
c10_56	RNB	PF00773.18	0	0	3.1371e-06	3.88748e-05	1.23658e-05	0	0
c9_7	UFD1	PF03152.13	0	0	0	4.04162e-05	1.39274e-05	0	0
c14_105	Glycos_transf_1	PF00534.19	0	0	5.05406e-06	2.8906e-05	1.49415e-05	5.14545e-06	0
c10_60	TspO_MBR	PF03073.14	0	0	0	4.28456e-05	1.10734e-05	0	0
c1_111	none	none	0	0	1.11683e-05	4.25838e-05	0	0	0
c4_3	Amidase	PF01425.20	0	0	3.71773e-06	3.89823e-05	1.09909e-05	0	0
c6_256	KAP_NTPase	PF07693.13	0	0	2.0592e-06	3.92577e-05	1.01461e-05	2.09644e-06	0
c4_71	none	none	0	0	1.37607e-05	2.62342e-05	1.35604e-05	0	0
c4_210	none	none	0	0	0	5.35205e-05	0	0	0
c6_244	none	none	0	0	0	3.52591e-05	1.82254e-05	0	0
c1_131	FAD_binding_7	PF03441.13	0	0	3.96791e-06	4.16055e-05	7.82031e-06	0	0
c1_332	none	none	0	0	0	5.33384e-05	0	0	0
c4_10	IMPDH	PF00478.24	0	4.10033e-06	1.09527e-05	3.82815e-05	0	0	0
c7_17	Aminotran_3	PF00202.20	0	0	8.46896e-06	3.63278e-05	8.34569e-06	0	0
c6_213	none	none	0	0	1.10335e-05	4.20698e-05	0	0	0
c6_242	none	none	0	0	0	2.54984e-05	1.31801e-05	0	1.42075e-05
c4_31	DAO	PF01266.23	0	0	4.56211e-06	3.47898e-05	1.34871e-05	0	0
c4_260	none	none	0	0	1.81578e-05	3.4617e-05	0	0	0
c4_116	p450	PF00067.21	0	0	0	4.55145e-05	7.2389e-06	0	0
c7_31	AA_kinonese	PF00696.27	2.27683e-06	2.53549e-06	2.25758e-06	3.65837e-05	8.89887e-06	0	0
c4_95	Peptidase_C92	PF05708.11	0	0	1.79498e-05	2.56653e-05	8.84425e-06	0	0
c6_282	none	none	0	0	4.95809e-06	4.25357e-05	4.88593e-06	0	0
c6_128	U-box	PF04564.14	0	0	1.08212e-05	3.3524e-05	7.99778e-06	0	0
c6_98	none	none	0	0	1.79792e-05	3.42765e-05	0	0	0
c10_20	none	none	0	0	1.52429e-05	2.1795e-05	1.50211e-05	0	0
c4_241	none	none	0	0	0	2.55732e-05	2.64376e-05	0	0
c1_348	none	none	0	0	0	3.42765e-05	1.77175e-05	0	0
c1_301	none	none	0	0	0	5.18397e-05	0	0	0
c4_289	none	none	0	0	0	2.02997e-05	3.14787e-05	0	0
c4_136	none	none	0	0	1.32776e-05	2.53132e-05	1.30843e-05	0	0
c4_154	none	none	0	0	0	7.09249e-06	3.6661e-05	0	7.90375e-06
c6_220	none	none	0	0	7.65873e-06	4.38031e-05	0	0	0
c1_367	Topoisom_I	PF01028.19	0	0	0	3.49962e-05	1.6445e-05	0	0
c5_4	none	none	0	0	0	4.38643e-05	7.55781e-06	0	0
c6_80	none	none	0	0	8.80201e-06	2.51709e-05	1.73478e-05	0	0
c2_44	Pkinonese	PF00069.24	0	0	0	4.60318e-05	5.28751e-06	0	0
c7_71	none	none	0	0	1.30875e-05	2.49507e-05	1.2897e-05	0	0
c14_7	DHBP_synthase	PF00926.18	0	0	3.09986e-06	3.84133e-05	9.16422e-06	0	0
c6_317	none	none	0	0	0	4.40845e-05	6.51065e-06	0	0
c14_64	SIS	PF01380.21	0	0	1.16179e-05	3.32235e-05	5.7244e-06	0	0
c1_141	AAA_12	PF13087.5	0	0	7.87127e-06	3.75156e-05	5.17114e-06	0	0
c10_28	none	none	0	0	0	4.5772e-05	4.73191e-06	0	0
c6_303	DUF924	PF06041.10	0	0	0	5.04553e-05	0	0	0
c1_152	none	none	0	0	7.47091e-06	3.56074e-05	7.36217e-06	0	0
c4_77	FbpA	PF05833.10	0	0	2.62e-06	3.99592e-05	7.74558e-06	0	0
c4_18	none	none	0	0	0	3.9902e-05	1.03127e-05	0	0
c6_164	Trypsin_2	PF13365.5	0	0	7.93582e-06	2.26939e-05	1.95508e-05	0	0
c6_184	none	none	0	3.3839e-06	6.02599e-06	2.87207e-05	8.90742e-06	3.06748e-06	0
c4_125	CTP_transf_like	PF01467.25	0	0	1.28123e-05	2.4426e-05	1.26258e-05	0	0
c4_13	none	none	0	0	2.55054e-05	2.43124e-05	0	0	0
c6_158	none	none	0	0	1.28875e-05	3.68543e-05	0	0	0
c10_27	none	none	0	0	0	2.4426e-05	2.52516e-05	0	0
c7_62	none	none	0	0	9.33387e-06	3.11406e-05	9.19802e-06	0	0
c8_4	Sulfatase	PF00884.22	0	0	3.82536e-06	3.82876e-05	7.53936e-06	0	0
c1_284	DUF1688	PF07958.10	0	0	2.5541e-06	2.19117e-05	2.51692e-05	0	0
c1_27	Collagen	PF01391.17	0	0	3.21433e-06	3.37039e-05	1.26702e-05	0	0
c4_170	Rnone_pol_N	PF01194.16	0	0	0	2.43124e-05	2.51341e-05	0	0
c1_95	none	none	0	0	0	3.99359e-05	9.17459e-06	0	0
c6_276	GTP_EFTU	PF00009.26	0	0	7.27275e-06	3.46629e-05	7.16689e-06	0	0
c7_8	none	none	0	6.15254e-06	1.09563e-05	2.61097e-05	0	0	5.81924e-06
c1_229	UPF0004	PF00919.19	0	0	7.24392e-06	3.1073e-05	1.07077e-05	0	0
c14_211	GTP_cyclohydroI	PF01227.21	0	0	1.01174e-05	2.89327e-05	9.97018e-06	0	0
c11_5	Glycos_transf_4	PF00953.20	0	0	6.26703e-06	2.38956e-05	1.85274e-05	0	0
c2_26	none	none	0	0	6.26703e-06	2.38956e-05	1.85274e-05	0	0
c1_335	DnoneJ_C	PF01556.17	0	0	2.48974e-05	2.37329e-05	0	0	0
c1_163	Pentapeptide	PF00805.21	0	0	2.1037e-05	2.00531e-05	0	0	7.44893e-06
c6_239	none	none	0	0	8.35922e-06	3.1873e-05	8.23756e-06	0	0
c7_27	tRnone-synt_1c	PF00749.20	0	1.26031e-05	0	3.5656e-05	0	0	0
c6_309	Ank_4	PF13637.5	0	6.13416e-06	0	3.1238e-05	1.07646e-05	0	0
c7_78	AAA_18	PF13238.5	0	0	0	3.98412e-05	8.23756e-06	0	0
c6_307	DSPc	PF00782.19	0	0	9.89829e-06	2.8306e-05	9.75422e-06	0	0
c14_97	none	none	0	0	0	2.81535e-05	9.70168e-06	1.0023e-05	0
c6_171	eRF1_2	PF03464.14	0	0	4.1386e-06	3.55053e-05	8.15673e-06	0	0
c12_1	CMAS	PF02353.19	0	5.46468e-06	4.86571e-06	2.78287e-05	9.58977e-06	0	0
c1_184	DUF2585	PF10755.8	0	0	0	2.34402e-05	2.42324e-05	0	0
c6_209	Pyridoxal_deC	PF00282.18	0	3.89052e-06	0	2.97186e-05	1.0241e-05	0	3.67976e-06
c6_119	none	none	0	0	4.10146e-06	3.1277e-05	1.21253e-05	0	0
c14_176	XRN_N	PF03159.17	0	2.20111e-06	5.87954e-06	3.54954e-05	1.93132e-06	1.99529e-06	0
c2_42	Ank_2	PF12796.6	3.28214e-06	0	0	2.48174e-05	1.60351e-05	3.31324e-06	0
c7_73	Methyltransf_12	PF08242.11	0	0	8.20906e-06	3.91255e-05	0	0	0
c14_18	none	none	0	0	5.42936e-06	3.10525e-05	1.07007e-05	0	0
c1_62	none	none	0	0	0	1.84706e-05	2.86422e-05	0	0
c6_44	none	none	0	1.3273e-05	0	3.37963e-05	0	0	0
c6_10	Ank_2	PF12796.6	0	5.66577e-06	5.04476e-06	2.88528e-05	7.457e-06	0	0
c10_53	Hydrolase_4	PF12146.7	0	0	5.44553e-06	4.15266e-05	0	0	0
c6_20	noneD_Gly3P_dh_C	PF07479.13	0	0	0	4.0701e-05	0	6.21003e-06	0
c10_4	none	none	0	0	9.73141e-06	3.7105e-05	0	0	0
c6_122	none	none	0	0	0	2.88794e-05	1.79133e-05	0	0
c6_65	Ribosomal_L31	PF01197.17	0	0	1.59873e-05	2.28593e-05	7.87731e-06	0	0
c4_168	none	none	0	7.47414e-06	6.65492e-06	1.26873e-05	1.96742e-05	0	0
c1_78	ResIII	PF04851.14	0	4.6989e-06	2.78924e-06	3.19054e-05	6.87161e-06	0	0
c1_142	none	none	0	0	0	3.42391e-05	1.17988e-05	0	0
c7_38	none	none	0	0	6.77831e-06	2.58451e-05	1.33593e-05	0	0
c14_203	none	none	0	2.48334e-05	0	2.10773e-05	0	0	0
c6_214	Beta-lactamase	PF00144.23	0	0	1.0576e-05	3.52846e-05	0	0	0
c10_16	none	none	0	0	7.89014e-06	3.00844e-05	7.7753e-06	0	0
c6_297	TruB_N	PF01509.17	0	0	0	3.76055e-05	0	8.03282e-06	0
c2_51	ubiquitin	PF00240.22	0	0	0	2.24342e-05	2.31924e-05	0	0
c1_312	none	none	0	0	0	4.10296e-05	0	0	4.57226e-06
c1_210	none	none	0	0	4.70296e-06	2.68979e-05	1.39035e-05	0	0
c14_103	none	none	0	1.01797e-05	9.06389e-06	1.72799e-05	8.93196e-06	0	0
c2_14	Ras	PF00071.21	0	0	2.77419e-05	1.76296e-05	0	0	0
c1_189	none	none	0	1.64671e-05	0	0	2.88975e-05	0	0
c1_283	none	none	0	6.46243e-06	5.75409e-06	2.74248e-05	5.67034e-06	0	0
c4_204	none	none	0	1.62071e-05	0	1.37557e-05	0	0	1.53291e-05
c1_288	Acyltransferase	PF01553.20	0	0	0	3.4881e-05	1.03028e-05	0	0
c14_102	none	none	0	5.72369e-06	5.09633e-06	2.42898e-05	1.00443e-05	0	0
c1_168	Peptidase_S8	PF00082.21	0	3.2759e-06	0	3.89257e-05	2.87438e-06	0	0
c1_328	Pribosyltran	PF00156.26	0	0	0	1.09127e-05	3.38445e-05	0	0
c7_21	BPL_LplA_LipB	PF03099.18	0	8.45975e-06	7.53249e-06	2.87207e-05	0	0	0
c10_15	none	none	0	0	0	2.94488e-05	1.52221e-05	0	0
c14_206	Helicase_C	PF00271.30	0	2.3765e-06	7.40605e-06	2.82386e-05	6.25565e-06	0	0
c1_277	none	none	0	0	0	3.4732e-05	0	9.27378e-06	0
c4_247	none	none	0	3.64204e-06	3.24284e-06	3.7094e-05	0	0	0
c6_154	none	none	0	0	1.78621e-05	8.5133e-06	1.76021e-05	0	0
c7_7	PCIF1_WW	PF12237.7	0	0	1.2332e-05	2.35105e-05	8.1017e-06	0	0
c1_35	Rnonese_HII	PF01351.17	0	0	0	3.4906e-05	9.02143e-06	0	0
c10_43	Acyl-CoA_dh_1	PF00441.23	0	0	5.68843e-06	3.25342e-05	5.60564e-06	0	0
c4_1	none	none	0	4.20102e-06	7.48111e-06	3.20904e-05	0	0	0
c14_121	DctP	PF03480.12	0	0	0	2.85898e-05	9.85203e-06	0	5.30999e-06
c2_11	GTP_EFTU	PF00009.26	0	0	5.02396e-06	3.11283e-05	7.42625e-06	0	0
c1_164	Pentapeptide	PF00805.21	2.80731e-06	3.12624e-06	5.56716e-06	2.91872e-05	0	2.83392e-06	0
c14_126	Peptidase_C1	PF00112.22	0	0	0	6.97886e-06	2.88589e-05	7.45369e-06	0
c4_286	zf-RING_2	PF13639.5	0	0	0	2.84085e-05	1.46843e-05	0	0
c6_117	Methyltransf_33	PF10017.8	0	0	1.59966e-06	3.20217e-05	9.45829e-06	0	0
c14_133	none	none	0	0	8.8876e-06	2.54157e-05	8.75824e-06	0	0
c6_208	none	none	0	0	0	4.2963e-05	0	0	0
c4_279	none	none	0	0	1.47807e-05	2.81788e-05	0	0	0
c6_302	none	none	0	0	0	3.19379e-05	1.10058e-05	0	0
c6_284	Epimerase	PF01370.20	0	0	0	3.40255e-05	8.79388e-06	0	0
c4_159	AdoHcyase_noneD	PF00670.20	0	0	4.38692e-06	2.50904e-05	8.64614e-06	0	4.66005e-06
c6_105	none	none	0	0	0	2.10349e-05	2.17458e-05	0	0
c4_223	none	none	0	0	0	4.26707e-05	0	0	0
c2_25	FGE-sulfatase	PF03781.15	0	0	7.97042e-06	2.65917e-05	3.92721e-06	4.05728e-06	0
c1_179	CMAS	PF02353.19	0	2.56719e-06	0	1.961e-05	2.02728e-05	0	0
c1_264	Peptidase_M1	PF01433.19	0	0	6.56987e-06	3.13129e-05	2.15808e-06	2.22956e-06	0
c4_222	none	none	0	0	0	4.21546e-05	0	0	0
c7_68	ABC2_membrane	PF01061.23	0	0	0	3.28377e-05	9.25843e-06	0	0
c8_19	zf-met	PF12874.6	0	9.47492e-06	8.43639e-06	2.41254e-05	0	0	0
c1_361	Pyridoxal_deC	PF00282.18	0	0	9.47909e-06	1.80714e-05	9.34112e-06	0	5.03463e-06
c14_123	none	none	0	0	1.17256e-05	1.86285e-05	1.15549e-05	0	0
c7_75	Mito_carr	PF00153.26	0	0	0	2.72603e-05	7.04542e-06	0	7.59461e-06
c13_4	none	none	0	0	4.81867e-06	2.75598e-05	9.49708e-06	0	0
c8_9	Pyr_redox_2	PF07992.13	0	0	1.06998e-05	1.5299e-05	1.58161e-05	0	0
c6_93	none	none	0	0	0	4.17505e-05	0	0	0
c1_286	none	none	0	0	0	2.75114e-05	1.42206e-05	0	0
c6_134	none	none	0	0	0	3.448e-05	7.12907e-06	0	0
c1_266	tRnone_U5-meth_tr	PF05958.10	0	0	0	3.08691e-05	1.06375e-05	0	0
c1_269	NMT	PF01233.18	0	0	4.7767e-06	3.1873e-05	4.70717e-06	0	0
c6_126	none	none	0	0	7.14948e-06	3.40754e-05	0	0	0
c6_347	none	none	0	0	6.09972e-06	2.90721e-05	6.01094e-06	0	0
c1_363	Sod_Cu	PF00080.19	0	0	0	2.66919e-05	9.19802e-06	0	4.9575e-06
c1_23	Hydrolase_4	PF12146.7	0	6.67248e-06	0	2.83162e-05	5.85464e-06	0	0
c4_99	none	none	0	0	1.0465e-05	1.9951e-05	1.03127e-05	0	0
c6_113	none	none	0	4.64807e-06	8.27721e-06	2.36702e-05	4.07837e-06	0	0
c4_171	none	none	0	0	7.03935e-06	3.35505e-05	0	0	0
c1_233	none	none	0	0	6.98554e-06	2.66352e-05	6.88387e-06	0	0
c7_3	Asp_Arg_Hydrox	PF05118.14	0	0	0	3.21672e-05	8.31359e-06	0	0
c1_191	Prok-RING_4	PF14447.5	0	0	0	3.21672e-05	8.31359e-06	0	0
c6_85	none	none	0	0	1.01174e-05	9.64422e-06	9.97018e-06	0	1.07473e-05
c6_328	TPD	PF14811.5	0	0	2.07191e-05	1.975e-05	0	0	0
c6_61	NTF2	PF02136.19	0	1.48046e-05	0	1.25653e-05	1.299e-05	0	0
c6_255	none	none	0	0	1.03465e-05	1.97252e-05	1.01959e-05	0	0
c6_168	Acyltransferase	PF01553.20	0	0	2.70131e-05	6.4374e-06	6.65497e-06	0	0
c1_252	none	none	0	0	0	2.33703e-05	8.05341e-06	0	8.68117e-06
c4_88	none	none	0	0	8.24609e-06	2.35812e-05	8.12607e-06	0	0
c1_38	ABC_tran	PF00005.26	0	0	2.96895e-06	3.3961e-05	2.92574e-06	0	0
c4_11	Sua5_yciO_yrdC	PF01300.17	0	0	0	2.45638e-05	1.52364e-05	0	0
c1_237	none	none	0	3.97335e-05	0	0	0	0	0
c1_243	none	none	0	0	6.88036e-06	3.27928e-05	0	0	0
c1_280	Evr1_Alr	PF04777.12	0	0	0	3.94503e-05	0	0	0
c6_252	ABC1	PF03109.15	0	0	8.92376e-06	1.27596e-05	1.31908e-05	4.54257e-06	0
c1_198	DUF1254	PF06863.11	0	4.13335e-06	3.6803e-06	3.15735e-05	0	0	0
c6_280	Pyr_redox_2	PF07992.13	0	0	1.15811e-05	2.20788e-05	5.70627e-06	0	0
c1_139	none	none	0	0	0	3.9302e-05	0	0	0
c14_166	none	none	0	0	0	2.58771e-05	1.33758e-05	0	0
c14_73	none	none	0	0	6.77831e-06	3.23063e-05	0	0	0
c12_5	Ion_trans_2	PF07885.15	0	3.76909e-06	0	3.199e-05	3.30712e-06	0	0
c6_202	none	none	0	0	0	3.88637e-05	0	0	0
c6_281	Peptidase_C14	PF00656.21	0	4.9868e-06	0	3.38602e-05	0	0	0
c1_14	Chorismate_synt	PF01264.20	0	0	5.05406e-06	3.37237e-05	0	0	0
c14_57	H2TH	PF06831.13	0	0	0	3.87676e-05	0	0	0
c6_206	Aldo_ket_red	PF00248.20	0	0	1.31819e-05	2.51306e-05	0	0	0
c1_196	none	none	0	0	9.8686e-06	2.50854e-05	0	3.34902e-06	0
c7_95	Ribosomal_S15	PF00312.21	0	0	0	1.86685e-05	9.64971e-06	9.96931e-06	0
c10_35	none	none	0	0	0	2.84601e-05	9.80733e-06	0	0
c2_27	VTC	PF09359.9	0	0	0	3.26019e-05	5.61729e-06	0	0
c6_294	HhH-GPD	PF00730.24	0	0	0	1.49135e-05	2.31263e-05	0	0
c4_233	none	none	0	0	1.30875e-05	2.49507e-05	0	0	0
c4_131	N6_Mtase	PF02384.15	0	2.43619e-06	4.33833e-06	2.48125e-05	6.41278e-06	0	0
c4_132	ResIII	PF04851.14	0	0	2.45134e-06	3.27136e-05	2.41566e-06	0	0
c1_240	none	none	0	0	0	2.47733e-05	1.28053e-05	0	0
c4_181	Metallophos	PF00149.27	0	0	0	2.60243e-05	1.15302e-05	0	0
c4_101	Aldedh	PF00171.21	0	0	0	2.21647e-05	1.52759e-05	0	0
c6_26	none	none	0	0	5.41328e-06	2.06403e-05	5.33449e-06	0	5.75031e-06
c6_30	Thiolase_N	PF00108.22	0	0	0	3.71013e-05	0	0	0
c6_189	Pro_isomerase	PF00160.20	0	0	9.5868e-06	2.74152e-05	0	0	0
c8_12	SKI	PF01202.21	0	0	0	2.72722e-05	0	9.70924e-06	0
c6_290	GTP_EFTU_D2	PF03144.24	0	0	0	3.13317e-05	0	5.57724e-06	0
c6_300	none	none	0	0	5.4618e-06	2.60317e-05	5.38231e-06	0	0
c4_76	DnoneJ	PF00226.30	0	0	0	2.74152e-05	9.44727e-06	0	0
c4_118	Spermine_synth	PF01564.16	0	0	0	2.84527e-05	8.4041e-06	0	0
c6_298	none_H_Exchanger	PF00999.20	0	0	3.16974e-06	2.71934e-05	6.24721e-06	0	0
c6_104	malic	PF00390.18	0	0	0	2.8255e-05	8.34569e-06	0	0
c4_284	none	none	0	0	0	1.78098e-05	9.20585e-06	9.51076e-06	0
c4_49	none	none	0	0	0	3.64262e-05	0	0	0
c6_169	ABC1	PF03109.15	0	0	4.16691e-06	1.98601e-05	1.23188e-05	0	0
c6_95	none	none	0	0	6.26703e-06	2.98695e-05	0	0	0
c7_74	CDP-OH_P_transf	PF01066.20	0	0	0	2.68519e-05	9.25314e-06	0	0
c14_91	XTBD	PF11952.7	0	0	0	3.60494e-05	0	0	0
c6_82	none	none	0	0	0	3.60139e-05	0	0	0
c3_2	Aminotran_1_2	PF00155.20	0	0	4.66694e-06	2.66919e-05	4.59901e-06	0	0
c1_102	none	none	0	8.0929e-06	0	2.06064e-05	7.10097e-06	0	0
c6_125	none	none	0	0	1.22952e-05	2.34402e-05	0	0	0
c1_345	none	none	0	0	0	3.56803e-05	0	0	0
c14_82	none	none	0	0	4.06497e-06	1.54994e-05	1.60232e-05	0	0
c14_6	AAA_22	PF13401.5	0	0	6.72428e-06	2.8844e-05	0	0	0
c1_360	none	none	0	0	0	2.94654e-05	6.09226e-06	0	0
c7_53	Glu_cyclase_2	PF05096.11	0	0	0	2.10208e-05	1.44875e-05	0	0
c1_67	2OG-FeII_Oxy_2	PF13532.5	0	0	0	3.52591e-05	0	0	0
c12_11	RNB	PF00773.18	0	0	0	3.1873e-05	3.29502e-06	0	0
c10_9	Methyltransf_23	PF13489.5	0	0	0	1.72799e-05	1.78639e-05	0	0
c1_87	Glyco_transf_25	PF01755.16	0	1.52255e-05	0	6.46127e-06	1.33593e-05	0	0
c6_70	none	none	0	0	0	2.89754e-05	5.99095e-06	0	0
c5_1	none	none	0	0	0	1.95408e-05	1.51509e-05	0	0
c14_175	none	none	0	0	0	2.74753e-05	7.10097e-06	0	0
c6_230	ADK	PF00406.21	0	0	0	2.69442e-05	0	0	7.50652e-06
c1_154	none	none	0	0	0	2.79694e-05	6.42549e-06	0	0
c10_14	Branch	PF02485.20	0	0	5.96049e-06	2.84085e-05	0	0	0
c1_39	RPE65	PF03055.14	0	0	8.85889e-06	2.53336e-05	0	0	0
c6_88	none	none	0	0	0	1.68076e-05	1.73757e-05	0	0
c12_17	none	none	0	0	0	2.71541e-05	7.01797e-06	0	0
c4_190	none	none	0	0	1.74639e-05	1.6647e-05	0	0	0
c1_110	none	none	0	0	0	3.40754e-05	0	0	0
c13_5	XPA_C	PF05181.11	0	6.46243e-06	0	2.19398e-05	5.67034e-06	0	0
c4_135	none	none	0	0	1.15933e-05	1.10511e-05	1.14246e-05	0	0
c6_310	none	none	0	0	1.72986e-05	1.64895e-05	0	0	0
c1_100	none	none	0	0	0	2.22433e-05	1.14975e-05	0	0
c6_319	none	none	0	0	8.71805e-06	2.49308e-05	0	0	0
c1_11	DnoneJ	PF00226.30	0	0	0	2.49308e-05	8.59115e-06	0	0
c4_188	zf-RING_2	PF13639.5	0	0	3.87537e-06	2.95529e-05	0	0	0
c13_2	none	none	0	6.20836e-06	1.10557e-05	1.05386e-05	5.44742e-06	0	0
c4_110	none	none	0	0	5.96535e-06	2.27454e-05	4.4089e-06	0	0
c1_134	DPRP	PF04244.12	0	0	0	1.21093e-05	2.08642e-05	0	0
c4_53	none	none	0	0	0	3.26698e-05	0	0	0
c1_187	none	none	0	0	0	2.70277e-05	5.58825e-06	0	0
c1_161	none	none	0	0	6.72841e-06	1.92411e-05	6.63047e-06	0	0
c1_315	AMP-binding	PF00501.27	0	0	1.11987e-05	2.13499e-05	0	0	0
c1_77	DUF285	PF03382.13	1.82041e-06	6.08166e-06	5.41506e-06	1.03236e-05	8.89374e-06	0	0
c4_271	none	none	0	0	0	2.14228e-05	1.10734e-05	0	0
c6_143	Exonuc_VII_L	PF02601.14	0	0	9.5534e-06	1.82131e-05	4.70717e-06	0	0
c10_1	none	none	0	0	0	3.23664e-05	0	0	0
c9_5	FA_hydroxylase	PF04116.12	0	0	0	2.40145e-05	8.2754e-06	0	0
c4_226	WD40	PF00400.31	0	0	4.76425e-06	2.27071e-05	4.69491e-06	0	0
c6_21	none	none	0	1.94649e-06	1.73314e-06	1.98249e-05	6.83165e-06	1.76448e-06	0
c13_6	none	none	0	0	5.56151e-06	2.65069e-05	0	0	0
c6_129	none	none	0	0	0	3.19379e-05	0	0	0
c1_6	DHQ_synthase	PF01761.19	0	1.41807e-06	6.31321e-06	2.04609e-05	3.73279e-06	0	0
c4_201	none	none	0	0	6.46657e-06	1.84923e-05	0	0	6.86918e-06
c1_112	SBP_bac_3	PF00497.19	0	0	1.29791e-05	1.2372e-05	6.39507e-06	0	0
c7_25	Dus	PF01207.16	0	0	0	2.62672e-05	5.43099e-06	0	0
c1_170	Dnone_topoisoIV	PF00521.19	0	0	1.64427e-06	2.35105e-05	4.86102e-06	1.67401e-06	0
c4_163	none	none	0	0	5.42936e-06	1.55262e-05	1.07007e-05	0	0
c14_41	none	none	0	0	0	2.33703e-05	8.05341e-06	0	0
c4_178	none	none	0	0	1.60811e-05	1.53289e-05	0	0	0
c4_108	none	none	0	0	6.37634e-06	6.0781e-06	1.88506e-05	0	0
c14_150	CLP_protease	PF00574.22	0	0	0	3.13004e-05	0	0	0
c1_7	none	none	0	0	5.3499e-06	1.5299e-05	1.05441e-05	0	0
c4_296	Homoserine_dh	PF00742.18	0	0	1.14577e-05	1.74749e-05	2.25818e-06	0	0
c6_221	Peptidase_M16_C	PF05193.20	0	0	1.90669e-06	2.36277e-05	5.63683e-06	0	0
c1_3	Aldo_ket_red	PF00248.20	0	0	6.42114e-06	1.83624e-05	6.32768e-06	0	0
c6_152	none	none	0	0	0	2.04186e-05	1.05544e-05	0	0
c1_66	none	none	0	0	0	3.093e-05	0	0	0
c4_90	zf-RING_2	PF13639.5	0	0	0	3.08206e-05	0	0	0
c6_341	none	none	0	0	0	3.08084e-05	0	0	0
c12_20	Acyltransferase	PF01553.20	0	0	6.3103e-06	1.20303e-05	1.24369e-05	0	0
c4_34	Dnone_pol_B_palm	PF14792.5	0	0	0	1.47383e-05	5.07879e-06	0	1.09494e-05
c14_153	SLT_2	PF13406.5	0	6.82782e-06	6.07944e-06	5.79509e-06	1.19819e-05	0	0
c12_22	none	none	0	0	0	1.50639e-05	1.5573e-05	0	0
c6_106	none	none	0	0	0	3.04495e-05	0	0	0
c6_265	none	none	0	0	1.55344e-05	1.48078e-05	0	0	0
c4_167	LicD	PF04991.12	0	0	0	1.49135e-05	1.54175e-05	0	0
c6_228	Pept_tRnone_hydro	PF01195.18	0	0	0	1.9951e-05	1.03127e-05	0	0
c1_156	none	none	0	0	0	3.02148e-05	0	0	0
c1_263	none	none	0	0	0	3.02148e-05	0	0	0
c7_77	none	none	0	0	0	1.48078e-05	1.53083e-05	0	0
c4_299	Cullin	PF00888.21	0	0	0	2.23489e-05	7.70143e-06	0	0
c14_159	BCDHK_Adom3	PF10436.8	0	0	5.15381e-06	1.9651e-05	5.07879e-06	0	0
c6_250	ABC_tran	PF00005.26	0	3.75416e-06	1.0028e-05	1.11521e-05	4.94103e-06	0	0
c14_108	none	none	0	0	6.16141e-06	1.76197e-05	6.07173e-06	0	0
c14_210	ABC_tran	PF00005.26	0	0	1.018e-05	1.29385e-05	6.68792e-06	0	0
c6_207	Aminotran_1_2	PF00155.20	0	0	5.13932e-06	1.95958e-05	5.06451e-06	0	0
c6_325	zf-C3HC4_3	PF13920.5	0	0	0	2.97562e-05	0	0	0
c1_349	CLP_protease	PF00574.22	0	0	0	2.97562e-05	0	0	0
c1_214	none	none	0	0	6.12015e-06	1.75017e-05	6.03107e-06	0	0
c12_13	none	none	0	0	0	2.95877e-05	0	0	0
c6_232	DUF1768	PF08719.10	0	0	0	2.95877e-05	0	0	0
c1_89	Transketolase_N	PF00456.20	0	3.37833e-06	6.01607e-06	1.72041e-05	2.96425e-06	0	0
c4_33	Methyltransf_15	PF09445.9	0	0	1.51273e-05	1.44198e-05	0	0	0
c6_327	Helicase_C	PF00271.30	0	0	3.38706e-06	1.61432e-05	1.00133e-05	0	0
c4_239	Capsid_NCLDV	PF04451.11	0	0	0	1.93718e-05	1.00133e-05	0	0
c1_24	none	none	0	0	2.5189e-06	1.92087e-05	4.96448e-06	0	2.67573e-06
c1_319	none	none	0	0	0	0	2.92099e-05	0	0
c1_85	Ceramidase	PF05875.11	0	0	0	2.17195e-05	7.48454e-06	0	0
c4_236	GCV_H	PF01597.18	0	0	0	0	2.91312e-05	0	0
c1_8	none	none	0	0	0	1.43014e-05	1.47848e-05	0	0
c11_10	EPSP_synthase	PF00275.19	0	0	0	1.21656e-05	1.25768e-05	4.33112e-06	0
c14_112	Asn_synthase	PF00733.20	0	0	3.74055e-06	1.7828e-05	7.37222e-06	0	0
c4_103	Ribosomal_L27	PF01016.18	0	0	7.47091e-06	2.13644e-05	0	0	0
c1_313	PolyA_pol	PF01743.19	0	0	0	2.02761e-05	8.38454e-06	0	0
c6_231	PAP2	PF01569.20	0	0	7.41034e-06	2.11912e-05	0	0	0
c1_291	none	none	0	0	5.94112e-06	2.26529e-05	0	0	0
c1_258	Peptidase_S74	PF13884.5	0	0	1.10187e-05	1.75056e-05	0	0	0
c1_178	none	none	0	0	0	1.40139e-05	1.44875e-05	0	0
c8_3	PRORP	PF16953.4	4.25089e-06	0	0	2.0089e-05	4.1536e-06	0	0
c4_303	Peptidase_M24	PF00557.23	0	0	9.7835e-06	1.86518e-05	0	0	0
c1_339	none	none	0	0	0	2.84085e-05	0	0	0
c4_17	none	none	0	2.95523e-06	5.26262e-06	1.75577e-05	2.59301e-06	0	0
c14_202	none	none	0	0	0	2.8306e-05	0	0	0
c4_124	none	none	0	0	0	9.18658e-06	1.89942e-05	0	0
c1_302	none	none	0	0	0	1.8569e-05	9.59829e-06	0	0
c4_162	Ribosomal_S18	PF01084.19	0	0	7.29209e-06	2.08531e-05	0	0	0
c6_343	Kinesin	PF00225.22	0	0	4.15743e-06	1.98149e-05	4.09692e-06	0	0
c6_191	ABC_tran	PF00005.26	0	0	3.21433e-06	1.53199e-05	9.50264e-06	0	0
c14_54	SIS	PF01380.21	2.93235e-06	0	2.90756e-06	2.21725e-05	0	0	0
c6_235	MS_channel	PF00924.17	0	0	9.62889e-06	1.8357e-05	0	0	0
c4_280	none	none	0	0	0	1.37557e-05	1.42206e-05	0	0
c1_126	Band_7	PF01145.24	0	0	7.14948e-06	1.36302e-05	7.04542e-06	0	0
c1_369	PIF1	PF05970.13	0	0	4.10146e-06	1.56385e-05	8.08352e-06	0	0
c6_277	none	none	0	5.13653e-06	4.57352e-06	8.71921e-06	4.50695e-06	0	4.85827e-06
c4_46	Exo_endo_phos	PF03372.22	0	0	5.73604e-06	1.64032e-05	5.65255e-06	0	0
c6_53	none	none	0	0	0	1.35888e-05	1.40481e-05	0	0
c14_71	Glycos_transf_N	PF04413.15	0	0	4.78921e-06	2.28261e-05	0	0	0
c1_127	Band_7	PF01145.24	0	0	0	1.35244e-05	1.39815e-05	0	0
c4_40	Collagen	PF01391.17	0	0	4.67888e-06	1.78402e-05	0	0	4.97019e-06
c6_274	none	none	0	0	0	1.80871e-05	9.3492e-06	0	0
c6_4	none	none	0	3.93527e-06	0	2.00403e-05	3.45293e-06	0	0
c6_322	Mito_carr	PF00153.26	0	7.64106e-06	0	1.29706e-05	6.70451e-06	0	0
c14_169	Acyl-CoA_dh_M	PF02770.18	0	0	4.06497e-06	2.32491e-05	0	0	0
c6_64	Glyco_transf_25	PF01755.16	0	0	0	2.72603e-05	0	0	0
c6_86	Glyco_hydro_18	PF00704.27	0	0	6.80354e-06	6.48532e-06	6.70451e-06	0	7.22713e-06
c1_293	none	none	0	0	1.84015e-05	8.77041e-06	0	0	0
c14_10	GDPD	PF03009.16	0	0	0	2.02081e-05	6.96371e-06	0	0
c7_23	none	none	0	0	1.38827e-05	1.32333e-05	0	0	0
c7_39	none	none	0	0	3.50393e-06	1.67002e-05	6.90586e-06	0	0
c6_89	none	none	0	0	0	1.33176e-05	1.37677e-05	0	0
c1_63	none	none	0	0	0	8.59731e-06	8.88789e-06	0	9.5807e-06
c14_45	Collagen	PF01391.17	1.87218e-06	0	0	1.76952e-05	5.48799e-06	0	1.97192e-06
c6_308	Transketolase_N	PF00456.20	0	2.3908e-06	2.12875e-06	1.82626e-05	4.19553e-06	0	0
c6_115	none	none	0	0	1.78621e-05	0	0	9.09253e-06	0
c4_250	ADP_ribosyl_GH	PF03747.13	0	0	0	1.77493e-05	9.17459e-06	0	0
c6_337	none	none	0	0	0	8.72649e-06	1.80429e-05	0	0
c14_58	none	none	0	0	6.87605e-06	1.63861e-05	3.38799e-06	0	0
c4_139	none	none	0	0	0	1.96019e-05	6.7548e-06	0	0
c6_190	Choline_kinonese	PF01633.19	0	0	0	1.28748e-05	1.33099e-05	0	0
c12_9	ABC_tran	PF00005.26	0	0	0	2.28118e-05	3.36898e-06	0	0
c1_223	none	none	0	0	0	2.61358e-05	0	0	0
c7_26	Pyridox_oxase_2	PF12766.6	0	0	0	2.6049e-05	0	0	0
c7_1	Peptidase_M17	PF00883.20	0	4.27094e-06	0	2.17497e-05	0	0	0
c1_129	none	none	0	0	2.59889e-05	0	0	0	0
c14_52	none	none	0	0	0	1.27492e-05	1.31801e-05	0	0
c1_51	His_Phos_1	PF00300.21	0	0	0	1.26873e-05	1.31161e-05	0	0
c1_113	none	none	0	0	0	2.58004e-05	0	0	0
c4_61	none	none	0	0	0	2.57496e-05	0	0	0
c1_308	none	none	0	0	6.55939e-06	6.25259e-06	1.29278e-05	0	0
c11_3	none	none	0	0	0	2.54984e-05	0	0	0
c10_54	CTP_transf_1	PF01148.19	0	0	0	1.67806e-05	8.67389e-06	0	0
c6_147	none	none	0	0	0	2.53746e-05	0	0	0
c6_286	GTP_EFTU	PF00009.26	0	0	4.39747e-06	2.0959e-05	0	0	0
c14_33	none	none	0	0	8.59506e-06	8.19305e-06	8.46996e-06	0	0
c1_31	ABC_tran	PF00005.26	0	3.61002e-06	3.21433e-06	1.83839e-05	0	0	0
c1_86	none	none	0	0	2.51544e-05	0	0	0	0
c14_209	ABC_tran	PF00005.26	0	0	3.25439e-06	1.86131e-05	3.20702e-06	0	0
c1_331	DcpS_C	PF11969.7	0	0	6.48953e-06	1.8558e-05	0	0	0
c4_255	PseudoU_synth_1	PF01416.19	0	0	0	1.48218e-05	1.02152e-05	0	0
c11_8	FAD_binding_4	PF01565.22	0	6.91988e-06	6.16141e-06	5.87322e-06	6.07173e-06	0	0
c4_115	Fe-S_biosyn	PF01521.19	0	0	0	1.22992e-05	1.27149e-05	0	0
c11_7	Dala_Dala_lig_C	PF07478.12	0	0	0	2.49865e-05	0	0	0
c1_118	THF_DHG_CYH_C	PF02882.18	0	0	0	5.9739e-06	1.23516e-05	0	6.65721e-06
c6_314	none	none	0	0	0	2.49507e-05	0	0	0
c14_187	DUF3846	PF12957.6	0	0	0	0	2.47882e-05	0	0
c6_14	none	none	0	0	0	1.63094e-05	8.43032e-06	0	0
c6_223	none	none	0	0	0	1.62334e-05	8.39105e-06	0	0
c4_243	none	none	0	0	6.37634e-06	1.82343e-05	0	0	0
c4_142	CTP_transf_like	PF01467.25	0	0	0	1.20442e-05	1.24512e-05	0	0
c6_324	PARP_regulatory	PF01358.17	0	0	0	1.92175e-05	0	5.13126e-06	0
c1_359	Endonuclease_1	PF04231.12	0	0	0	2.42372e-05	0	0	0
c6_192	Mrr_cat_2	PF13156.5	0	0	0	7.89602e-06	1.63258e-05	0	0
c6_15	none	none	0	0	0	1.59365e-05	8.23756e-06	0	0
c4_156	none	none	0	0	0	1.99054e-05	4.11564e-06	0	0
c6_11	none	none	0	0	0	2.40145e-05	0	0	0
c1_26	MS_channel	PF00924.17	0	0	0	1.77997e-05	6.13375e-06	0	0
c4_134	NifU_N	PF01592.15	0	0	0	2.3923e-05	0	0	0
c12_16	ABC_tran	PF00005.26	0	0	6.91507e-06	9.88745e-06	3.40721e-06	0	3.6728e-06
c1_254	zf-RING_2	PF13639.5	0	0	0	2.37959e-05	0	0	0
c6_272	PLDc_2	PF13091.5	0	0	0	2.37959e-05	0	0	0
c4_253	none	none	0	0	1.44433e-05	4.58926e-06	4.74437e-06	0	0
c6_288	2OG-FeII_Oxy_3	PF13640.5	0	0	0	0	2.37357e-05	0	0
c1_20	IPPT	PF01715.16	0	0	6.14071e-06	1.75605e-05	0	0	0
c1_218	Amino_oxidase	PF01593.23	0	0	6.90201e-06	9.86879e-06	3.40078e-06	3.51341e-06	0
c6_212	Mur_ligase_M	PF08245.11	0	0	4.82716e-06	9.20276e-06	9.5138e-06	0	0
c1_305	ABC1	PF03109.15	0	0	0	1.52618e-05	3.94441e-06	0	4.25187e-06
c1_53	zf-RING_2	PF13639.5	0	0	0	2.34402e-05	0	0	0
c6_261	Peptidase_C97	PF05903.13	0	0	1.1973e-05	1.1413e-05	0	0	0
c1_253	Lipase_GDSL	PF00657.21	0	0	0	7.61978e-06	1.57546e-05	0	0
c14_114	GT-D	PF08759.10	0	3.77602e-06	0	9.61465e-06	9.93961e-06	0	0
c1_148	none	none	0	0	0	2.32836e-05	0	0	0
c6_140	none	none	0	0	7.89014e-06	7.5211e-06	7.7753e-06	0	0
c4_242	Capsid_N	PF16903.4	0	2.94252e-06	5.23999e-06	1.49847e-05	0	0	0
c8_10	Bax1-I	PF01027.19	0	0	0	1.71009e-05	5.89295e-06	0	0
c12_23	none	none	0	0	0	2.28593e-05	0	0	0
c4_104	none	none	0	0	5.86487e-06	1.11811e-05	5.7795e-06	0	0
c6_33	none	none	0	0	0	1.11931e-05	1.15714e-05	0	0
c10_38	DUF563	PF04577.13	0	0	0	1.80714e-05	4.67056e-06	0	0
c6_163	FGE-sulfatase	PF03781.15	0	0	3.90018e-06	1.11533e-05	7.68682e-06	0	0
c1_203	none	none	0	0	0	2.24342e-05	0	0	0
c14_148	none	none	0	0	5.17326e-06	1.72595e-05	0	0	0
c1_151	RNB	PF00773.18	0	0	2.097e-06	1.19935e-05	6.19943e-06	2.13492e-06	0
c6_71	none	none	0	0	0	2.23702e-05	0	0	0
c14_19	none	none	0	0	0	2.22749e-05	0	0	0
c4_160	none	none	0	0	5.64743e-06	5.38328e-06	1.11305e-05	0	0
c10_2	none	none	0	0	0	2.2149e-05	0	0	0
c1_278	LacAB_rpiB	PF02502.17	0	0	1.13065e-05	1.07777e-05	0	0	0
c2_37	Peripla_BP_6	PF13458.5	0	0	0	1.56221e-05	6.46006e-06	0	0
c4_264	none	none	0	0	6.13613e-06	9.74854e-06	2.0156e-06	4.16472e-06	0
c4_113	none	none	0	0	0	0	2.20565e-05	0	0
c6_100	none	none	0	0	7.41034e-06	0	1.4605e-05	0	0
c6_243	ABC_tran	PF00005.26	0	0	3.20869e-06	1.22344e-05	3.16199e-06	0	3.40846e-06
c7_92	none	none	0	0	0	2.19629e-05	0	0	0
c6_269	Cupin_8	PF13621.5	0	0	3.75593e-06	1.4321e-05	0	3.82384e-06	0
c4_165	none	none	0	0	0	2.16297e-05	0	0	0
c4_26	none	none	0	0	7.4405e-06	1.4185e-05	0	0	0
c5_2	none	none	0	0	0	2.15999e-05	0	0	0
c1_56	none	none	0	2.24197e-06	1.99623e-06	1.14172e-05	5.90153e-06	0	0
c1_101	none	none	0	0	0	1.05974e-05	1.09556e-05	0	0
c4_143	FA_desaturase	PF00487.23	0	0	5.47817e-06	5.22194e-06	1.07969e-05	0	0
c14_2	TB2_DP1_HVA22	PF03134.18	0	1.13629e-05	1.01174e-05	0	0	0	0
c14_142	none	none	0	0	0	1.05174e-05	1.08729e-05	0	0
c1_238	none	none	0	0	5.52787e-06	1.5808e-05	0	0	0
c1_10	Peptidase_C1_2	PF03051.14	0	0	0	1.50552e-05	6.22562e-06	0	0
c2_53	none	none	0	0	0	2.12775e-05	0	0	0
c6_75	zf-RING_2	PF13639.5	0	0	0	1.04543e-05	1.08077e-05	0	0
c14_87	none	none	0	0	7.20585e-06	6.86881e-06	7.10097e-06	0	0
c1_310	CDO_I	PF05995.11	0	0	0	2.11626e-05	0	0	0
c7_76	none	none	0	0	5.47817e-06	1.56658e-05	0	0	0
c1_216	Abhydrolase_3	PF07859.12	0	0	0	2.11412e-05	0	0	0
c10_30	DUF829	PF05705.13	0	0	0	1.3902e-05	7.18595e-06	0	0
c10_48	GTP_EFTU	PF00009.26	0	0	0	2.10773e-05	0	0	0
c4_48	tRnone-synt_1d	PF00750.18	0	0	3.12103e-06	1.48753e-05	3.0756e-06	0	0
c7_19	PCIF1_WW	PF12237.7	0	0	1.06998e-05	1.01993e-05	0	0	0
c7_91	none	none	0	0	0	1.60977e-05	4.75481e-06	0	0
c1_91	none	none	0	0	0	0	2.0784e-05	0	0
c4_140	none	none	0	0	0	2.07633e-05	0	0	0
c4_172	tRnone-synt_2d	PF01409.19	0	0	0	1.35771e-05	7.01797e-06	0	0
c12_6	Oxidored_molyb	PF00174.18	0	0	0	1.01171e-05	1.0459e-05	0	0
c12_15	LysM	PF01476.19	0	9.01053e-06	0	1.14715e-05	0	0	0
c6_293	none	none	0	0	0	2.04186e-05	0	0	0
c14_8	RibD_C	PF01872.16	0	0	5.99634e-06	1.14317e-05	2.95453e-06	0	0
c6_139	none	none	4.22169e-06	0	4.18599e-06	1.19706e-05	0	0	0
c4_121	none	none	0	0	4.18599e-06	1.19706e-05	4.12507e-06	0	0
c10_58	GATase_4	PF13230.5	0	0	6.95895e-06	1.32669e-05	0	0	0
c14_134	none	none	0	0	0	9.91872e-06	1.0254e-05	0	0
c6_79	Peptidase_M41	PF01434.17	0	3.25512e-06	0	8.28832e-06	8.56845e-06	0	0
c1_96	HATPase_c_3	PF13589.5	0	0	0	2.00714e-05	0	0	0
c6_194	none	none	0	0	1.99405e-05	0	0	0	0
c1_297	none	none	0	0	4.08314e-06	7.78431e-06	8.04741e-06	0	0
c4_59	none	none	0	0	0	9.75218e-06	1.00818e-05	0	0
c6_318	Dala_Dala_lig_C	PF07478.12	0	0	6.77831e-06	1.29225e-05	0	0	0
c1_346	RPE65	PF03055.14	0	4.4371e-06	3.95076e-06	1.12979e-05	0	0	0
c4_52	none	none	0	0	0	1.29706e-05	6.70451e-06	0	0
c6_311	DUF1295	PF06966.11	0	0	0	6.4137e-06	1.32609e-05	0	0
c14_84	none	none	0	0	1.00067e-05	9.53863e-06	0	0	0
c4_175	none	none	0	0	0	9.23528e-06	0	0	1.02916e-05
c2_50	none	none	0	0	3.36214e-06	1.28195e-05	3.3132e-06	0	0
c4_294	Exo_endo_phos	PF03372.22	0	0	6.70373e-06	1.27804e-05	0	0	0
c4_14	ABC_tran	PF00005.26	0	0	0	1.94801e-05	0	0	0
c6_84	none	none	0	0	0	1.4028e-05	5.43828e-06	0	0
c6_73	none	none	0	0	0	6.34365e-06	1.31161e-05	0	0
c4_237	Acetyltransf_1	PF00583.24	0	0	6.51265e-06	0	1.28357e-05	0	0
c6_47	Alpha-amylase	PF00128.23	0	0	3.94224e-06	7.5157e-06	7.76971e-06	0	0
c6_227	tRnone-synt_2d	PF01409.19	0	0	6.58301e-06	1.25502e-05	0	0	0
c6_211	none	none	0	0	3.91689e-06	7.46738e-06	7.71977e-06	0	0
c4_150	none	none	0	0	0	1.88028e-05	0	0	0
c4_107	none	none	0	0	9.5285e-06	9.08283e-06	0	0	0
c6_348	none	none	0	0	0	1.8602e-05	0	0	0
c14_48	none	none	0	0	0	1.22344e-05	6.32397e-06	0	0
c4_186	tRnone-synt_2d	PF01409.19	0	0	0	1.21139e-05	6.26169e-06	0	0
c4_161	none	none	0	0	0	1.83732e-05	0	0	0
c4_199	Peptidase_S41	PF03572.17	0	0	0	1.2072e-05	6.24e-06	0	0
c9_1	none	none	0	0	0	1.20303e-05	6.21845e-06	0	0
c1_176	none	none	0	0	0	1.82131e-05	0	0	0
c4_256	none	none	0	0	0	1.82131e-05	0	0	0
c6_237	Ras	PF00071.21	9.32615e-06	0	0	8.81478e-06	0	0	0
c6_166	none	none	0	0	9.2473e-06	8.81478e-06	0	0	0
c1_82	ZnuA	PF01297.16	0	0	7.37545e-06	7.03049e-06	3.63405e-06	0	0
c6_46	Formyl_trans_N	PF00551.18	0	0	0	8.8596e-06	9.15904e-06	0	0
c6_58	none	none	0	0	0	8.8596e-06	9.15904e-06	0	0
c1_221	none	none	0	0	0	1.79937e-05	0	0	0
c1_73	Epimerase	PF01370.20	0	0	6.09972e-06	5.81442e-06	6.01094e-06	0	0
c6_153	none	none	0	0	0	1.79013e-05	0	0	0
c4_216	none	none	0	0	0	1.79013e-05	0	0	0
c4_146	none	none	0	0	1.78041e-05	0	0	0	0
c10_32	Peptidase_A8	PF01252.17	0	0	0	5.79509e-06	1.19819e-05	0	0
c6_292	none	none	0	0	0	1.77393e-05	0	0	0
c1_64	Pkinonese	PF00069.24	0	0	0	1.76793e-05	0	0	0
c7_82	none	none	0	0	0	1.76593e-05	0	0	0
c6_144	none	none	0	0	0	1.76593e-05	0	0	0
c1_104	ATPgrasp_TupA	PF14305.5	0	0	6.03926e-06	1.15136e-05	0	0	0
c1_194	FMO-like	PF00743.18	0	0	0	1.74384e-05	0	0	0
c1_351	none	none	0	0	0	1.72704e-05	0	0	0
c1_169	Glycos_transf_1	PF00534.19	0	1.20877e-05	0	5.1297e-06	0	0	0
c4_55	MscL	PF01741.17	0	0	0	0	1.72097e-05	0	0
c4_195	none	none	0	0	0	1.71383e-05	0	0	0
c8_2	none	none	0	0	1.71364e-05	0	0	0	0
c4_297	SKI	PF01202.21	0	0	0	1.71195e-05	0	0	0
c10_3	Ras	PF00071.21	0	0	0	8.39032e-06	8.67389e-06	0	0
c6_200	none	none	0	0	2.89834e-06	5.52555e-06	8.56845e-06	0	0
c10_46	none	none	0	0	0	5.48496e-06	1.13407e-05	0	0
c1_183	none	none	0	0	8.59506e-06	8.19305e-06	0	0	0
c1_217	Lycopene_cycl	PF05834.11	0	0	4.29417e-06	8.18664e-06	4.23167e-06	0	0
c1_323	none	none	0	0	8.55484e-06	8.15471e-06	0	0	0
c1_268	none	none	0	0	8.51499e-06	8.11672e-06	0	0	0
c7_4	Ras	PF00071.21	0	0	0	0	1.66272e-05	0	0
c6_54	Pribosyltran	PF00156.26	0	0	5.68254e-06	1.08335e-05	0	0	0
c7_22	zf-RING_2	PF13639.5	0	0	0	1.64895e-05	0	0	0
c4_184	Ribosomal_L34	PF00468.16	0	0	0	1.64635e-05	0	0	0
c14_79	none	none	0	0	0	1.63861e-05	0	0	0
c6_266	none	none	0	0	0	0	1.62766e-05	0	0
c1_181	none	none	0	0	1.62238e-05	0	0	0	0
c1_255	ABC_tran	PF00005.26	0	0	3.3194e-06	6.32829e-06	6.54217e-06	0	0
c1_222	none	none	0	0	0	1.61832e-05	0	0	0
c10_41	SBP_bac_6	PF13343.5	0	0	0	5.26932e-06	1.08948e-05	0	0
c14_157	DUF924	PF06041.10	0	0	0	7.93197e-06	8.20006e-06	0	0
c1_239	Glyco_transf_25	PF01755.16	0	0	0	7.93197e-06	8.20006e-06	0	0
c1_61	none	none	0	0	8.20906e-06	7.8251e-06	0	0	0
c7_34	Semialdhyde_dhC	PF02774.17	0	0	5.47817e-06	1.04439e-05	0	0	0
c14_188	none	none	0	0	0	0	1.57088e-05	0	0
c10_8	none	none	0	0	0	1.56035e-05	0	0	0
c7_65	adh_short_C2	PF13561.5	0	0	0	7.65325e-06	7.91191e-06	0	0
c6_299	ABC_tran	PF00005.26	0	0	3.23138e-06	1.2321e-05	0	0	0
c4_238	DUF202	PF02656.14	0	0	0	0	0	1.54221e-05	0
c12_28	Ribosomal_S16	PF00886.18	0	0	7.85623e-06	7.48878e-06	0	0	0
c4_28	Ank_2	PF12796.6	0	0	0	1.00911e-05	5.21606e-06	0	0
c4_169	none	none	0	0	0	1.53065e-05	0	0	0
c4_111	Exo_endo_phos	PF03372.22	0	0	0	1.00813e-05	5.21103e-06	0	0
c4_179	none	none	0	0	0	1.50639e-05	0	0	0
c4_176	Ribosomal_S19	PF00203.20	0	0	0	1.50422e-05	0	0	0
c1_234	TPM_phosphatase	PF04536.13	0	0	0	9.88122e-06	5.1076e-06	0	0
c1_182	zf-RING_2	PF13639.5	0	0	0	1.49348e-05	0	0	0
c1_228	ZZ	PF00569.16	0	0	0	1.49348e-05	0	0	0
c1_88	DUF1475	PF07343.10	0	0	0	0	1.49277e-05	0	0
c1_257	none	none	0	0	2.18996e-06	1.04376e-05	2.15808e-06	0	0
c4_193	zf-RING_2	PF13639.5	0	0	0	1.47244e-05	0	0	0
c6_67	none	none	0	0	0	7.23984e-06	7.48454e-06	0	0
c4_5	Thioredoxin_4	PF13462.5	0	0	0	0	1.46843e-05	0	0
c2_41	none	none	0	0	0	0	1.45656e-05	0	0
c6_19	none	none	0	0	0	4.73905e-06	9.79843e-06	0	0
c1_93	Ribosomal_S14	PF00253.20	0	0	0	1.44797e-05	0	0	0
c14_75	Glycos_transf_2	PF00535.25	0	0	0	4.71341e-06	9.74542e-06	0	0
c6_48	none	none	0	0	9.75739e-06	4.6505e-06	0	0	0
c4_254	none	none	0	0	0	1.43341e-05	0	0	0
c6_225	Ufd2P_core	PF10408.8	0	0	2.47123e-06	9.42256e-06	2.43526e-06	0	0
c6_124	none	none	0	0	0	1.4321e-05	0	0	0
c1_158	none	none	0	0	0	1.4243e-05	0	0	0
c6_137	DUF72	PF01904.17	0	0	7.26311e-06	6.9234e-06	0	0	0
c14_122	DUF285	PF03382.13	0	0	0	1.25164e-05	1.61743e-06	0	0
c1_352	none	none	0	0	0	1.40894e-05	0	0	0
c2_24	NTP_transf_5	PF14907.5	0	0	0	1.40327e-05	0	0	0
c6_339	Asp_Arg_Hydrox	PF05118.14	0	0	0	1.40139e-05	0	0	0
c4_138	none	none	0	0	0	0	1.38916e-05	0	0
c8_15	none	none	0	0	0	1.38652e-05	0	0	0
c4_130	none	none	0	0	0	1.38652e-05	0	0	0
c7_93	PhyH	PF05721.12	0	0	0	6.81508e-06	7.04542e-06	0	0
c1_250	Peptidase_M14	PF00246.23	0	0	0	1.37678e-05	0	0	0
c14_205	none	none	0	0	0	1.37557e-05	0	0	0
c6_233	Lactamase_B	PF00753.26	0	0	0	6.76218e-06	6.99073e-06	0	0
c14_98	none	none	0	0	0	8.96598e-06	4.63451e-06	0	0
c9_6	none	none	0	0	0	1.35419e-05	0	0	0
c2_34	none	none	0	0	0	1.35419e-05	0	0	0
c6_283	none	none	0	0	0	1.35244e-05	0	0	0
c6_174	ABC1	PF03109.15	0	0	4.58499e-06	4.37054e-06	4.51826e-06	0	0
c6_74	none	none	0	0	0	6.6083e-06	6.83165e-06	0	0
c6_264	Exo_endo_phos	PF03372.22	0	0	0	6.6083e-06	6.83165e-06	0	0
c14_89	FtsJ	PF01728.18	0	0	0	1.34145e-05	0	0	0
c10_33	none	none	0	0	0	1.31336e-05	0	0	0
c1_279	Choline_kinonese	PF01633.19	0	0	0	6.34365e-06	0	6.77526e-06	0
c7_66	ABC_tran	PF00005.26	0	0	0	6.40977e-06	6.62641e-06	0	0
c14_93	none	none	0	0	0	1.30353e-05	0	0	0
c14_158	none	none	0	0	0	1.28748e-05	0	0	0
c4_72	Acyltransferase	PF01553.20	0	0	0	1.28274e-05	0	0	0
c4_35	none	none	0	0	0	1.27804e-05	0	0	0
c12_2	none	none	0	0	0	6.23023e-06	6.44081e-06	0	0
c6_316	noneD_binding_8	PF13450.5	0	2.34975e-06	2.0922e-06	1.99434e-06	6.18524e-06	0	0
c1_155	none	none	0	0	0	0	1.25379e-05	0	0
c6_141	ABC_tran	PF00005.26	0	0	0	9.28999e-06	3.20132e-06	0	0
c6_270	XRN_N	PF03159.17	0	0	0	9.91872e-06	2.56349e-06	0	0
c1_70	EamA	PF00892.19	0	0	0	1.24753e-05	0	0	0
c1_69	Ribosomal_L28	PF00830.18	0	0	6.37634e-06	6.0781e-06	0	0	0
c7_57	none	none	0	0	0	6.1208e-06	6.32768e-06	0	0
c14_69	Lip_A_acyltrans	PF03279.12	0	0	0	6.1208e-06	6.32768e-06	0	0
c1_235	Ribosom_S12_S23	PF00164.24	0	0	0	6.1208e-06	6.32768e-06	0	0
c14_81	noneD_kinonese	PF01513.20	0	0	0	1.2372e-05	0	0	0
c7_6	CAP_C	PF08603.10	0	0	0	1.22992e-05	0	0	0
c6_22	Peptidase_M16	PF00675.19	0	0	0	8.09159e-06	4.18254e-06	0	0
c1_306	TspO_MBR	PF03073.14	0	0	0	1.2213e-05	0	0	0
c3_3	none	none	0	0	0	5.91308e-06	6.11294e-06	0	0
c1_188	none	none	0	0	0	0	1.19554e-05	0	0
c2_20	EamA	PF00892.19	0	0	0	1.18799e-05	0	0	0
c14_63	none	none	0	0	0	1.18799e-05	0	0	0
c14_49	none	none	0	0	3.04817e-06	5.81119e-06	3.0038e-06	0	0
c4_100	none	none	0	0	0	1.17201e-05	0	0	0
c6_321	GIY-YIG	PF01541.23	0	0	0	1.17026e-05	0	0	0
c1_79	none	none	0	0	0	1.15902e-05	0	0	0
c11_4	Mur_ligase_M	PF08245.11	0	0	0	8.93097e-06	2.63795e-06	0	0
c6_240	none	none	0	0	5.92187e-06	5.64489e-06	0	0	0
c6_76	none	none	0	0	0	5.66324e-06	5.85464e-06	0	0
c1_195	none	none	0	0	5.77226e-06	5.50228e-06	0	0	0
c2_38	SET	PF00856.27	0	0	0	1.12654e-05	0	0	0
c1_247	GATase	PF00117.27	0	0	3.84278e-06	7.32609e-06	0	0	0
c4_149	none	none	0	0	1.10335e-05	0	0	0	0
c6_103	none	none	0	0	0	5.38328e-06	5.56523e-06	0	0
c1_186	zf-RING_2	PF13639.5	0	0	0	1.09127e-05	0	0	0
c4_16	none	none	0	0	0	0	1.08077e-05	0	0
c1_370	ATP_bind_3	PF01171.19	0	0	0	1.07334e-05	0	0	0
c6_334	Acetyltransf_1	PF00583.24	0	0	0	1.0646e-05	0	0	0
c2_22	none	none	0	0	0	0	1.06062e-05	0	0
c1_358	Patatin	PF01734.21	0	0	0	5.20634e-06	5.38231e-06	0	0
c2_4	none	none	0	0	3.58643e-06	6.83737e-06	0	0	0
c1_94	none	none	0	0	0	1.03817e-05	0	0	0
c1_116	none	none	0	0	0	4.9949e-06	2.58186e-06	2.66737e-06	0
c12_7	none	none	0	0	0	1.01993e-05	0	0	0
c1_36	none	none	0	0	0	1.01993e-05	0	0	0
c14_164	none	none	0	0	1.01737e-05	0	0	0	0
c4_259	none	none	0	0	5.19777e-06	4.95466e-06	0	0	0
c8_13	none	none	0	0	0	1.01498e-05	0	0	0
c1_17	none	none	0	0	0	9.93758e-06	0	0	0
c2_7	none	none	0	0	0	9.91872e-06	0	0	0
c6_148	none	none	0	0	4.98514e-06	4.75197e-06	0	0	0
c6_246	none	none	0	0	0	9.6979e-06	0	0	0
c1_192	U-box	PF04564.14	0	0	0	9.66205e-06	0	0	0
c4_47	none	none	0	0	0	9.64422e-06	0	0	0
c14_85	His_Phos_1	PF00300.21	0	0	0	9.64422e-06	0	0	0
c6_66	SGL	PF08450.11	0	0	0	9.59113e-06	0	0	0
c6_78	zf-RING_2	PF13639.5	0	0	0	9.59113e-06	0	0	0
c1_309	DUF4174	PF13778.5	0	0	0	9.53863e-06	0	0	0
c14_68	none	none	0	0	0	0	0	0	9.48707e-06
c4_202	none	none	0	0	0	0	9.44727e-06	0	0
c4_261	none	none	0	0	0	9.43532e-06	0	0	0
c1_329	SNO	PF01174.18	0	0	0	9.43532e-06	0	0	0
c11_6	Transgly	PF00912.21	0	0	0	6.19333e-06	3.20132e-06	0	0
c14_72	ABC1	PF03109.15	0	0	0	0	9.34112e-06	0	0
c4_166	SET	PF00856.27	0	0	8.97488e-06	0	0	0	0
c7_46	FNIP	PF05725.11	0	0	0	8.93915e-06	0	0	0
c12_29	none	none	0	0	0	4.39258e-06	4.54104e-06	0	0
c1_251	none	none	0	0	0	8.8596e-06	0	0	0
c1_108	GSHPx	PF00255.18	0	0	0	0	8.84425e-06	0	0
c1_97	PTS_2-Rnone	PF01885.15	0	0	8.80201e-06	0	0	0	0
c4_129	none	none	0	0	0	8.77041e-06	0	0	0
c1_249	Methyltransf_4	PF02390.16	0	0	0	8.72649e-06	0	0	0
c6_287	GTP_EFTU	PF00009.26	0	0	0	2.77156e-06	2.86524e-06	0	3.08858e-06
c14_20	2OG-FeII_Oxy_2	PF13532.5	0	0	8.59506e-06	0	0	0	0
c14_50	TGT	PF01702.17	0	0	0	0	8.5234e-06	0	0
c6_112	RVT_1	PF00078.26	0	0	0	5.5697e-06	2.87898e-06	0	0
c1_220	none	none	0	0	0	8.38359e-06	0	0	0
c1_13	RCC1	PF00415.17	0	0	0	3.96298e-06	0	0	4.41627e-06
c6_149	zf-C3HC4_3	PF13920.5	0	0	0	8.23176e-06	0	0	0
c1_204	Ribosomal_L36	PF00444.17	0	0	8.20906e-06	0	0	0	0
c4_126	none	none	0	0	0	8.07908e-06	0	0	0
c14_154	none	none	0	0	0	8.00485e-06	0	0	0
c1_343	nonePRTase	PF04095.15	0	0	0	0	7.85441e-06	0	0
c1_230	zf-RING_2	PF13639.5	0	0	0	7.79011e-06	0	0	0
c4_273	none	none	0	0	0	0	7.54726e-06	0	0
c1_21	none	none	0	0	0	0	7.51577e-06	0	0
c14_15	Alpha-amylase	PF00128.23	0	0	0	7.38822e-06	0	0	0
c4_97	none	none	0	0	0	7.36221e-06	0	0	0
c2_36	none	none	0	0	7.35074e-06	0	0	0	0
c12_24	PhyH	PF05721.12	0	0	0	7.33123e-06	0	0	0
c4_85	none	none	0	0	0	7.27005e-06	0	0	0
c6_83	His_Phos_1	PF00300.21	0	0	0	7.18017e-06	0	0	0
c6_68	H2TH	PF06831.13	0	0	0	0	0	7.16664e-06	0
c2_46	FBPase	PF00316.19	0	7.16127e-06	0	0	0	0	0
c2_47	RINGv	PF12906.6	0	0	0	0	7.07308e-06	0	0
c4_164	none	none	0	0	0	7.06374e-06	0	0	0
c11_2	Mito_carr	PF00153.26	0	0	0	7.03522e-06	0	0	0
c7_63	none	none	0	0	0	7.00693e-06	0	0	0
c4_174	Band_7	PF01145.24	0	0	0	0	6.99073e-06	0	0
c12_26	ABC_tran	PF00005.26	0	3.74844e-06	0	3.18148e-06	0	0	0
c1_29	5-FTHF_cyc-lig	PF01812.19	0	0	0	0	6.72956e-06	0	0
c6_224	zf-RING_2	PF13639.5	0	0	0	0	6.67965e-06	0	0
c1_180	DUF1365	PF07103.10	0	0	0	6.65881e-06	0	0	0
c14_61	Guanylate_kin	PF00625.20	0	0	0	6.58333e-06	0	0	0
c4_212	none	none	0	0	0	6.53396e-06	0	0	0
c10_13	none	none	0	0	0	6.50955e-06	0	0	0
c14_76	PIG-L	PF02585.16	0	0	0	6.48532e-06	0	0	0
c1_342	CN_hydrolase	PF00795.21	0	0	0	6.36683e-06	0	0	0
c12_30	none	none	0	0	0	6.34365e-06	0	0	0
c1_99	Sulfotransfer_3	PF13469.5	0	0	0	6.3398e-06	0	0	0
c6_203	none	none	0	0	0	0	6.32768e-06	0	0
c14_156	none	none	0	0	0	6.32064e-06	0	0	0
c14_184	none	none	0	0	0	6.23023e-06	0	0	0
c1_138	none	none	0	0	0	0	6.13375e-06	0	0
c1_353	SPRY	PF00622.27	0	5.99095e-06	0	0	0	0	0
c4_21	Patatin	PF01734.21	0	0	0	5.95349e-06	0	0	0
c1_143	DAGK_cat	PF00781.23	0	0	5.94112e-06	0	0	0	0
c6_342	none	none	0	0	0	5.89309e-06	0	0	0
c2_17	zf-RING_2	PF13639.5	0	0	5.80895e-06	0	0	0	0
c1_236	none	none	0	0	0	5.73783e-06	0	0	0
c1_74	GDP_Man_Dehyd	PF16363.4	0	0	0	0	5.68825e-06	0	0
c7_41	HlyIII	PF03006.19	0	0	0	5.41675e-06	0	0	0
c6_43	none	none	0	0	0	5.28531e-06	0	0	0
c1_219	SQS_PSY	PF00494.18	0	0	0	5.25343e-06	0	0	0
c1_371	none	none	0	0	0	5.25343e-06	0	0	0
c1_326	none	none	0	0	0	5.23764e-06	0	0	0
c10_59	none	none	0	0	5.2275e-06	0	0	0	0
c12_27	MIT	PF04212.17	0	0	0	5.22194e-06	0	0	0
c4_177	DUF285	PF03382.13	0	0	0	4.98458e-06	0	0	0
c9_2	BCDHK_Adom3	PF10436.8	0	0	0	4.85796e-06	0	0	0
c1_226	GCV_T	PF01571.20	0	0	0	4.70069e-06	0	0	0
c7_24	Prenyltransf	PF01255.18	0	4.62712e-06	0	0	0	0	0
c14_138	none	none	0	0	0	4.52961e-06	0	0	0
c4_301	none	none	0	0	0	0	4.50695e-06	0	0
c1_344	FMO-like	PF00743.18	0	0	0	0	4.50695e-06	0	0
c7_86	MFS_1	PF07690.15	0	0	0	4.29512e-06	0	0	0
c2_32	Lactamase_B_2	PF12706.6	0	0	0	3.4941e-06	0	0	0
c7_43	ABC_tran	PF00005.26	0	0	0	3.23463e-06	0	0	0
c6_188	FPN1	PF06963.11	0	0	0	3.1873e-06	0	0	0
c12_10	ABC_tran	PF00005.26	0	0	0	3.1699e-06	0	0	0
c13_1	none	none	0	0	0	0	0	0	0
c1_1	none	none	0	0	0	0	0	0	0
c8_1	DOT1	PF08123.12	0	0	0	0	0	0	0
c5_3	none	none	0	0	0	0	0	0	0
c5_5	none	none	0	0	0	0	0	0	0
c9_4	Peptidase_C1_2	PF03051.14	0	0	0	0	0	0	0
c6_2	none	none	0	0	0	0	0	0	0
c5_6	none	none	0	0	0	0	0	0	0
c5_7	GIY-YIG	PF01541.23	0	0	0	0	0	0	0
c14_4	none	none	0	0	0	0	0	0	0
c5_8	Pox_A32	PF04665.11	0	0	0	0	0	0	0
c1_5	none	none	0	0	0	0	0	0	0
c2_6	none	none	0	0	0	0	0	0	0
c10_7	none	none	0	0	0	0	0	0	0
c4_8	none	none	0	0	0	0	0	0	0
c10_10	none	none	0	0	0	0	0	0	0
c10_11	none	none	0	0	0	0	0	0	0
c10_12	none	none	0	0	0	0	0	0	0
c2_10	Thioredoxin	PF00085.19	0	0	0	0	0	0	0
c6_9	none	none	0	0	0	0	0	0	0
c7_13	none	none	0	0	0	0	0	0	0
c1_12	none	none	0	0	0	0	0	0	0
c14_13	none	none	0	0	0	0	0	0	0
c12_14	none	none	0	0	0	0	0	0	0
c11_11	none	none	0	0	0	0	0	0	0
c7_18	zf-RING_2	PF13639.5	0	0	0	0	0	0	0
c2_19	EamA	PF00892.19	0	0	0	0	0	0	0
c12_18	none	none	0	0	0	0	0	0	0
c12_19	none	none	0	0	0	0	0	0	0
c2_21	none	none	0	0	0	0	0	0	0
c4_19	none	none	0	0	0	0	0	0	0
c8_17	none	none	0	0	0	0	0	0	0
c1_18	none	none	0	0	0	0	0	0	0
c1_19	none	none	0	0	0	0	0	0	0
c6_23	none	none	0	0	0	0	0	0	0
c6_24	none	none	0	0	0	0	0	0	0
c12_25	none	none	0	0	0	0	0	0	0
c7_28	none	none	0	0	0	0	0	0	0
c7_29	none	none	0	0	0	0	0	0	0
c2_28	none	none	0	0	0	0	0	0	0
c14_25	none	none	0	0	0	0	0	0	0
c10_34	none	none	0	0	0	0	0	0	0
c6_29	none	none	0	0	0	0	0	0	0
c10_36	none	none	0	0	0	0	0	0	0
c2_31	Abhydrolase_1	PF00561.19	0	0	0	0	0	0	0
c1_28	none	none	0	0	0	0	0	0	0
c4_29	His_Phos_1	PF00300.21	0	0	0	0	0	0	0
c4_30	none	none	0	0	0	0	0	0	0
c2_35	OpuAC	PF04069.11	0	0	0	0	0	0	0
c7_36	CM_2	PF01817.20	0	0	0	0	0	0	0
c6_35	none	none	0	0	0	0	0	0	0
c4_36	none	none	0	0	0	0	0	0	0
c4_37	Methyltransf_23	PF13489.5	0	0	0	0	0	0	0
c2_39	BACK	PF07707.14	0	0	0	0	0	0	0
c6_38	none	none	0	0	0	0	0	0	0
c4_39	none	none	0	0	0	0	0	0	0
c7_42	none	none	0	0	0	0	0	0	0
c10_45	none	none	0	0	0	0	0	0	0
c14_37	none	none	0	0	0	0	0	0	0
c7_45	DUF2306	PF10067.8	0	0	0	0	0	0	0
c2_43	none	none	0	0	0	0	0	0	0
c2_45	none	none	0	0	0	0	0	0	0
c7_47	ABC_tran	PF00005.26	0	0	0	0	0	0	0
c4_45	none	none	0	0	0	0	0	0	0
c10_51	none	none	0	0	0	0	0	0	0
c2_49	none	none	0	0	0	0	0	0	0
c6_50	His_Phos_1	PF00300.21	0	0	0	0	0	0	0
c7_51	Lysine_decarbox	PF03641.13	0	0	0	0	0	0	0
c2_52	none	none	0	0	0	0	0	0	0
c2_54	none	none	0	0	0	0	0	0	0
c7_55	DUF814	PF05670.12	0	0	0	0	0	0	0
c7_56	none	none	0	0	0	0	0	0	0
c1_54	none	none	0	0	0	0	0	0	0
c4_57	none	none	0	0	0	0	0	0	0
c4_58	none	none	0	0	0	0	0	0	0
c14_51	PQ-loop	PF04193.13	0	0	0	0	0	0	0
c1_57	zf-RING_2	PF13639.5	0	0	0	0	0	0	0
c1_58	none	none	0	0	0	0	0	0	0
c6_62	none	none	0	0	0	0	0	0	0
c1_59	Ribosomal_S17	PF00366.19	0	0	0	0	0	0	0
c7_67	ABC_tran	PF00005.26	0	0	0	0	0	0	0
c14_56	zf-RING_2	PF13639.5	0	0	0	0	0	0	0
c7_69	SMC_N	PF02463.18	0	0	0	0	0	0	0
c7_70	none	none	0	0	0	0	0	0	0
c14_59	none	none	0	0	0	0	0	0	0
c14_60	none	none	0	0	0	0	0	0	0
c7_72	none	none	0	0	0	0	0	0	0
c4_65	none	none	0	0	0	0	0	0	0
c6_69	none	none	0	0	0	0	0	0	0
c1_71	none	none	0	0	0	0	0	0	0
c6_72	none	none	0	0	0	0	0	0	0
c14_65	none	none	0	0	0	0	0	0	0
c14_66	Hydrolase_3	PF08282.11	0	0	0	0	0	0	0
c1_76	none	none	0	0	0	0	0	0	0
c7_83	none	none	0	0	0	0	0	0	0
c6_77	zf-RING_2	PF13639.5	0	0	0	0	0	0	0
c6_81	Phosphononete-bd	PF12974.6	0	0	0	0	0	0	0
c7_89	none	none	0	0	0	0	0	0	0
c1_80	none	none	0	0	0	0	0	0	0
c1_81	none	none	0	0	0	0	0	0	0
c7_94	none	none	0	0	0	0	0	0	0
c14_74	Acyltransferase	PF01553.20	0	0	0	0	0	0	0
c1_84	Acetyltransf_10	PF13673.6	0	0	0	0	0	0	0
c7_97	none	none	0	0	0	0	0	0	0
c7_99	none	none	0	0	0	0	0	0	0
c6_90	Methyltransf_3	PF01596.16	0	0	0	0	0	0	0
c7_101	none	none	0	0	0	0	0	0	0
c14_77	none	none	0	0	0	0	0	0	0
c14_80	Acetyltransf_1	PF00583.24	0	0	0	0	0	0	0
c1_92	none	none	0	0	0	0	0	0	0
c14_83	Cyt-b5	PF00173.27	0	0	0	0	0	0	0
c6_97	none	none	0	0	0	0	0	0	0
c1_98	none	none	0	0	0	0	0	0	0
c14_95	none	none	0	0	0	0	0	0	0
c14_96	none	none	0	0	0	0	0	0	0
c1_103	none	none	0	0	0	0	0	0	0
c1_105	none	none	0	0	0	0	0	0	0
c4_98	none	none	0	0	0	0	0	0	0
c1_107	none	none	0	0	0	0	0	0	0
c1_109	none	none	0	0	0	0	0	0	0
c4_102	none	none	0	0	0	0	0	0	0
c14_101	none	none	0	0	0	0	0	0	0
c4_105	none	none	0	0	0	0	0	0	0
c14_106	none	none	0	0	0	0	0	0	0
c6_116	none	none	0	0	0	0	0	0	0
c14_111	APH	PF01636.22	0	0	0	0	0	0	0
c14_113	none	none	0	0	0	0	0	0	0
c4_112	none	none	0	0	0	0	0	0	0
c6_120	none	none	0	0	0	0	0	0	0
c6_121	none	none	0	0	0	0	0	0	0
c14_115	HAD_2	PF13419.5	0	0	0	0	0	0	0
c14_116	Glyco_transf_90	PF05686.11	0	0	0	0	0	0	0
c14_117	PfkB	PF00294.23	0	0	0	0	0	0	0
c14_118	Glyco_transf_9	PF01075.16	0	0	0	0	0	0	0
c6_127	none	none	0	0	0	0	0	0	0
c1_132	none	none	0	0	0	0	0	0	0
c4_122	Peptidase_S11	PF00768.19	0	0	0	0	0	0	0
c1_135	NUDIX	PF00293.27	0	0	0	0	0	0	0
c1_136	none	none	0	0	0	0	0	0	0
c6_133	zf-C3HC4_3	PF13920.5	0	0	0	0	0	0	0
c1_144	none	none	0	0	0	0	0	0	0
c4_133	none	none	0	0	0	0	0	0	0
c14_132	zf-RING_2	PF13639.5	0	0	0	0	0	0	0
c1_146	none	none	0	0	0	0	0	0	0
c6_146	none	none	0	0	0	0	0	0	0
c6_151	none	none	0	0	0	0	0	0	0
c14_146	none	none	0	0	0	0	0	0	0
c6_160	none	none	0	0	0	0	0	0	0
c6_161	CYTH	PF01928.20	0	0	0	0	0	0	0
c1_160	none	none	0	0	0	0	0	0	0
c6_170	none	none	0	0	0	0	0	0	0
c1_167	zf-RING_2	PF13639.5	0	0	0	0	0	0	0
c6_172	none	none	0	0	0	0	0	0	0
c6_173	none	none	0	0	0	0	0	0	0
c14_152	MtN3_slv	PF03083.15	0	0	0	0	0	0	0
c6_175	none	none	0	0	0	0	0	0	0
c14_155	none	none	0	0	0	0	0	0	0
c6_180	zf-RING_2	PF13639.5	0	0	0	0	0	0	0
c1_172	none	none	0	0	0	0	0	0	0
c1_174	none	none	0	0	0	0	0	0	0
c1_175	none	none	0	0	0	0	0	0	0
c1_177	none	none	0	0	0	0	0	0	0
c4_173	none	none	0	0	0	0	0	0	0
c6_187	none	none	0	0	0	0	0	0	0
c14_167	none	none	0	0	0	0	0	0	0
c1_185	none	none	0	0	0	0	0	0	0
c4_183	Abhydrolase_3	PF07859.12	0	0	0	0	0	0	0
c1_193	none	none	0	0	0	0	0	0	0
c4_185	none	none	0	0	0	0	0	0	0
c6_198	none	none	0	0	0	0	0	0	0
c4_187	none	none	0	0	0	0	0	0	0
c4_189	none	none	0	0	0	0	0	0	0
c1_200	none	none	0	0	0	0	0	0	0
c6_210	none	none	0	0	0	0	0	0	0
c6_215	none	none	0	0	0	0	0	0	0
c6_216	none	none	0	0	0	0	0	0	0
c1_213	none	none	0	0	0	0	0	0	0
c14_194	none	none	0	0	0	0	0	0	0
c6_226	none	none	0	0	0	0	0	0	0
c14_201	none	none	0	0	0	0	0	0	0
c4_215	none	none	0	0	0	0	0	0	0
c4_228	none	none	0	0	0	0	0	0	0
c4_230	none	none	0	0	0	0	0	0	0
c4_232	none	none	0	0	0	0	0	0	0
c6_248	none	none	0	0	0	0	0	0	0
c4_235	none	none	0	0	0	0	0	0	0
c1_241	EamA	PF00892.19	0	0	0	0	0	0	0
c6_259	none	none	0	0	0	0	0	0	0
c1_260	Cpn10	PF00166.20	0	0	0	0	0	0	0
c1_261	none	none	0	0	0	0	0	0	0
c1_262	RelA_SpoT	PF04607.16	0	0	0	0	0	0	0
c1_265	none	none	0	0	0	0	0	0	0
c1_267	none	none	0	0	0	0	0	0	0
c1_273	none	none	0	0	0	0	0	0	0
c6_285	none	none	0	0	0	0	0	0	0
c6_291	Inositol_P	PF00459.24	0	0	0	0	0	0	0
c6_295	none	none	0	0	0	0	0	0	0
c1_290	none	none	0	0	0	0	0	0	0
c4_268	none	none	0	0	0	0	0	0	0
c1_298	DUF3605	PF12239.7	0	0	0	0	0	0	0
c6_306	none	none	0	0	0	0	0	0	0
c4_276	none	none	0	0	0	0	0	0	0
c1_303	Pyrophosphatase	PF00719.18	0	0	0	0	0	0	0
c1_307	none	none	0	0	0	0	0	0	0
c6_312	none	none	0	0	0	0	0	0	0
c6_313	none	none	0	0	0	0	0	0	0
c1_311	none	none	0	0	0	0	0	0	0
c4_283	none	none	0	0	0	0	0	0	0
c6_320	Pterin_4a	PF01329.18	0	0	0	0	0	0	0
c1_321	none	none	0	0	0	0	0	0	0
c1_324	none	none	0	0	0	0	0	0	0
c1_325	none	none	0	0	0	0	0	0	0
c6_335	none	none	0	0	0	0	0	0	0
c1_336	ACPS	PF01648.19	0	0	0	0	0	0	0
c6_340	none	none	0	0	0	0	0	0	0
c1_341	none	none	0	0	0	0	0	0	0
c1_350	Mito_carr	PF00153.26	0	0	0	0	0	0	0
c1_354	Methyltransf_23	PF13489.5	0	0	0	0	0	0	0
c1_355	none	none	0	0	0	0	0	0	0
c1_357	none	none	0	0	0	0	0	0	0
c1_362	none	none	0	0	0	0	0	0	0
c1_372	none	none	0	0	0	0	0	0	0
